# Supplementary material for: Essential core competencies for scope of practice of paediatric oncology nurses in Latin America: a scoping review protocol
Source: PubMed Central journal article supplement — BMJ Open. 2022 Jul 22;12(7):e061853. doi: 10.1136/bmjopen-2022-061853 (PMC9316046; doi:10.1136/bmjopen-2022-061853), 2022-07-22
Supplement: bmjopen-2022-061853.draft_revisions.pdf [file bmjopen-2022-061853.draft_revisions.pdf]

# BMJ Open

BMJ Open is committed to open peer review. As part of this commitment we make the peer review history of every article we publish publicly available.

When an article is published we post the peer reviewers' comments and the authors' responses online. We also post the versions of the paper that were used during peer review. These are the versions that the peer review comments apply to.

The versions of the paper that follow are the versions that were submitted during the peer review process. They are not the versions of record or the final published versions. They should not be cited or distributed as the published version of this manuscript.

BMJ Open is an open access journal and the full, final, typeset and author-corrected version of record of the manuscript is available on our site with no access controls, subscription charges or pay-per-view fees (<http://bmjopen.bmj.com>).

If you have any questions on BMJ Open's open peer review process please email [info.bmjopen@bmj.com](mailto:info.bmjopen@bmj.com)

# BMJ Open

## Essential Core Competencies for scope of practice of Paediatric Oncology Nurses in Latin America: a scoping review protocol

|                               |                                                                                                                                                                                                                                                                                                                                                                                                                                                                                                                                                                                                                                                                                                                                                                                 |
|-------------------------------|---------------------------------------------------------------------------------------------------------------------------------------------------------------------------------------------------------------------------------------------------------------------------------------------------------------------------------------------------------------------------------------------------------------------------------------------------------------------------------------------------------------------------------------------------------------------------------------------------------------------------------------------------------------------------------------------------------------------------------------------------------------------------------|
| Journal:                      | <i>BMJ Open</i>                                                                                                                                                                                                                                                                                                                                                                                                                                                                                                                                                                                                                                                                                                                                                                 |
| Manuscript ID                 | bmjopen-2022-061853                                                                                                                                                                                                                                                                                                                                                                                                                                                                                                                                                                                                                                                                                                                                                             |
| Article Type:                 | Protocol                                                                                                                                                                                                                                                                                                                                                                                                                                                                                                                                                                                                                                                                                                                                                                        |
| Date Submitted by the Author: | 09-Feb-2022                                                                                                                                                                                                                                                                                                                                                                                                                                                                                                                                                                                                                                                                                                                                                                     |
| Complete List of Authors:     | <p>LOPES-JÚNIOR, LUÍS CARLOS; Universidade Federal do Espírito Santo, Nursing Department<br/> Lima, Regina Aparecida Garcia; Universidade de Sao Paulo Campus de Ribeirao Preto<br/> Maia, Edmara Bazoni Soares ; Universidade Federal de São Paulo, Nursing Department<br/> Ribeiro, Karina de Cássia Braga ; Pan American Health Organization<br/> Fuentes-Alabí, Soad ; Pan American Health Organization<br/> Sullivan, Courtney E. ; The University of Alabama at Birmingham Center for Outcomes and Effectiveness Research and Education<br/> Abraham, Monnie ; St Jude Children's Research Hospital, Department of Global Pediatric Medicine<br/> Weber, Lorena Segovia ; Hospital Luis Calvo Mackenna<br/> Ponce, Liliana Vásquez ; Pan American Health Organization</p> |
| Keywords:                     | Paediatric oncology < ONCOLOGY, Paediatric oncology < PAEDIATRICS, MEDICAL EDUCATION & TRAINING                                                                                                                                                                                                                                                                                                                                                                                                                                                                                                                                                                                                                                                                                 |
|                               |                                                                                                                                                                                                                                                                                                                                                                                                                                                                                                                                                                                                                                                                                                                                                                                 |

SCHOLARONE™  
Manuscripts

***Title Page – BMJ Open***

**Essential Core Competencies for scope of practice of Paediatric Oncology Nurses in Latin America: a scoping review protocol**

**Authors:**

Luís Carlos Lopes-Júnior<sup>1</sup>, RN, OCN, Ph.D.

Regina Aparecida Garcia Lima<sup>2\*</sup>, RN, Ph.D.

Edmara Bazoni Soares Maia<sup>3</sup>, RN., CPN., Ph.D

Karina de Cássia Braga Ribeiro<sup>4</sup>, BDS, Ph.D

Soad Fuentes-Alabí<sup>4</sup>, MD

Courtney E. Sullivan<sup>5</sup>, PhD, APRN, CPNP-AC, CPHON

Monnie Abraham<sup>6</sup>, PhD, MSN, FISQua, CPHQ

Lorena Segovia Weber<sup>7</sup>, RN

Liliana Vásquez Ponce<sup>4</sup>, MD

**Affiliations and addresses:**

<sup>1</sup> Nursing Department at Federal University of Espírito Santo. Vitória, ES, Brazil.

<sup>2</sup> University of São Paulo at Ribeirão Preto College of Nursing. Ribeirão Preto, SP.

<sup>3</sup> Nursing Department at Federal University of São Paulo. São Paulo, SP, Brazil.

<sup>4</sup> Pan American Health Organization (PAHO). Washington, DC, USA.

<sup>5</sup> Center for Outcomes and Effectiveness Research and Education (COERE), The University of Alabama at Birmingham, USA.

<sup>6</sup> Department of Global Pediatric Medicine, St. Jude Children's Research Hospital, St. Jude Global, Memphis, TN, USA.

<sup>7</sup> Hospital Dr. Luis Calvo Mackenna, Santiago, Chile.  
Brazil.

**Corresponding author:** Regina Aparecida Garcia de Lima. RN., Ph.D. Full Professor, Department of Maternal-Infant and Public Health Nursing, University of São Paulo at Ribeirão Preto College of Nursing – PAHO/WHO Collaborating Centre for Nursing Research Development, Ribeirão Preto, São Paulo, Brazil. E-mail: limare@eerp.usp.br; Phone: +5516 3315-0542. ORCID: 0000-0002-0611- 562

**Keywords:** Paediatric Oncology Nursing; Competencies; Scope of Practice; Oncology, Latin America.

**Word Count: 1892 words.**

## ABSTRACT

**Introduction:** Nurses comprise the largest group of health workers globally and are essential to the provision of care necessary for delivering curative therapy to children with cancer. In high-income countries, previous studies of the nurse workforce have shown an association between patient morbidity and mortality and nursing-related factors such as staffing, education, and the nursing practice environment. There is currently limited evidence available to define the scope of essential core competencies for paediatric oncology nursing practice internationally, and specifically in Latin America. Clearly defined essential core competencies contribute to establishing nurses' scope of practice within clinical practice, education and research settings. Here, we aimed to map and synthesize the available evidence on the scope of paediatric oncology nursing practices in the context of clinical practice, educational training and research settings in Latin America.

**Methods:** A scoping review (ScR) protocol is reported, adhering to the PRISMA-P statement and guided by The Joanna Briggs Institute. MEDLINE/PubMed, Cochrane Library; Embase; CINAHL, Web-of-Science; Scopus; Science Direct and LILACS, plus additional sources, such as The ProQuest Dissertation & Theses Global, The British Library, Google Scholar, medRxiv, ClinicalTrials.gov and WHO ICTRP will be searched. No date or language restrictions will be employed in this scoping review. Two independent researchers will conduct the search strategy, study selection, data charting, and data synthesis. The findings will be presented through tables, charts, narrative summaries, and assessed based on the type of data charted and the outcomes.

**Ethics/dissemination:** This protocol does not require ethical approval. In addition, the plans for the dissemination comprise peer-reviewed publication and conference presentations, to be shared with International Oncology Societies/International Nursing Societies and advisory groups to inform discussions on future research. We expect that our results will be of interest to nurse professionals, especially, paediatric haematology/oncology nurses and nurse scholars concerned with this particular issue.

**Registration:** *Open Science Framework (OSF/Center for Open Science/USA)*, (Register ID: osf.io/24sv9)

### Strengths and limitations of this study

- To the best of our knowledge this will be the first scoping review to address the Essential Core Competencies for the scope of practice of Paediatric Oncology Nurses in Latin America.
- The review will adopt a rigorous approach, adhering to Preferred Reporting Items for Systematic Reviews and Meta-Analyses-Scoping Review (PRISMA-ScR) guidelines, using a comprehensive and systematic search strategy, including all study designs with no time period or language restrictions.

- To ensure the transparency of information sourced for review, the protocol includes clearly defined inclusion criteria aligned with the *Population, Concept and Context* strategy according to the Joanna Briggs Institute guidelines.
- The paucity of literature addressing the scope of practice of Paediatric Oncology Nurses may limit findings, specifically factors associated with regulatory frameworks of the profession in different Latin American countries.

## INTRODUCTION

As the battle against childhood and adolescent cancer continues to become a global concern, capacity-building initiatives to improve survival and outcomes in resource-constrained locations will be increasingly prioritized.<sup>1-3</sup> As such, it is important to identify essential core competencies to ensure that paediatric oncology nurses have the knowledge, skills, attitudes and other characteristics deemed necessary for safe and effective professional practice. The identification of these competencies will help to determine the scope of subspecialty nursing practice, promote competent workforces, facilitate professional mobility, and aid in comparative evaluation of the profession and professionals' experiences at a regional level.

Nurses constitute the largest group of health professionals worldwide<sup>7-11</sup> and are key to the provision of optimal care for children and adolescents with cancer. In high-income countries, previous studies<sup>4-5</sup> on the nursing workforce have shown an association between patient morbidity and mortality and factors related to nursing, such as dimensioning nursing staff, education and specialized nursing practice. Although specialization has been associated with better patient outcomes, in many countries paediatric oncology is just now emerging as a recognized subspecialty. Available evidence on the scope of professional practice through essential competencies to support quality nursing practice in paediatric oncology internationally, especially in Latin America, is still incipient.<sup>6</sup> To effectively build paediatric oncology nursing capacity, essential core competencies reflective of nurses' scope of practice must be identified and incorporated into clinical practice, education, and research. Thus, a scoping review will be performed to identify essential core competencies for paediatric oncology nursing practice in Latin America.

## RESEARCH AIM

To map and synthesize the available evidence on the scope of paediatric oncology nursing practices in the context of clinical practice, educational training and research settings in Latin America.

## METHODS

### Study design

This is a scoping review, which aims to systematically map the key concepts in the given field of research, clarify the definitions and conceptual limits. Also, for identify evidence, analyze knowledge gaps and examine how research is conducted in the given field, providing a descriptive analysis of the reviewed studies.<sup>12-13</sup>

This review will be reported following the *Preferred Reporting Items for Systematic Review and Meta-Analyses extension for Scoping Reviews (PRISMA-ScR)*<sup>14</sup> and is in line with the *Joanna Briggs Institute (JBI) Manual for Evidence Synthesis*<sup>13</sup>. Steps of the review include the: 1) Definition and alignment of objectives and the research question; 2) elaboration of the inclusion criteria according to the objective(s) and the guiding question; 3) description of the planned approach to the evidence search, selection, data extraction and presentation of evidence; 4) search for evidence; 5) selection of evidence; 6) extraction of evidence; 7) analysis of evidence; 8) presentation of results and 9) synthesis of evidence in relation to review, conclusions and implications of the results.

To guarantee data reliability and methodological transparency of this review, the protocol was submitted for evaluation and registration in the *Open Science Framework (OSF / Center for Open Science/USE)*. Approval was obtained on 15/08/2021 (Register ID: osf.io/24sv9). To formulate the review question, we have used the PCC strategy<sup>14</sup> (*P – Population; C – Concept; C – Context;*), where P = Population (certified paediatric oncology nurse), C = Concept (essential core competencies in paediatric oncology), C = Context (clinical practice, education and research). This strategy facilitated structured critical reasoning on the topic and the formulation of the following review question: "*What are the essential competencies for Paediatric Oncology Nursing in the context of clinical practice, educational training and research settings in Latin America?*"

### Search strategy

The literature search will be carried out systematically in eight electronic databases: *Medical Literature Analysis and Retrieval System Online* (MEDLINE) through *PubMed*, *Cochrane Library*, *EMBASE*, *Cumulative Index to Nursing and Allied Health Literature* (CINAHL), *Web of Science*, SCOPUS, Science Direct and *Latin American and Caribbean Health Sciences Literature* (LILACS). The search strategy for the studies will consist of a combination of controlled descriptors (indexers in the respective databases) and keywords, according to the indication offered in each electronic database. It is emphasized that there will be no date or language restriction in the search strategy to be carried out. In addition to the electronic databases mentioned above, secondary searches will be carried out in a variety of other sources, such as in *ProQuest Dissertations and Theses Global*, *The British Library* and *Google Scholar* and *Preprints for Health Sciences [medRxiv]*, *ClinicalTrials.gov* and *WHO International Clinical Trials Registry Platform*. Furthermore, the list of final references in the included primary studies will be manually analyzed to find relevant studies to be added. Two researchers will perform the search strategy independently, according to the recommendations of the JBI guidelines.<sup>13</sup> Initially, we will identify the existence of an index of specific subject titles in each database (such as *MeSH terms*, *CINAHL Headings*, *Entree terms* and the *DeCS*) and their synonyms (keywords). Subsequently, the search terms were combined using the Boolean operators "AND" and "OR".<sup>15-17</sup> The pilot search strategy that combines the controlled MeSH descriptors and keywords used in MEDLINE/PubMed is as follows:

**P- POPULATION:**

#1 ((Oncology Nursing [MeSH Terms] OR "Nursing, Oncology" [All Fields] OR "Oncologic Nursing" [All Fields] OR "Cancer Nursing" [All Fields] OR "Nursing, Cancer" [All Fields] OR "Oncological Nursing" [All Fields] OR "Oncology Certified Nurse" [All Fields]))

#2 (("Pediatric Nursing [MeSH Terms] OR "Nursing, Pediatric" [All Fields] OR "Pediatric Oncology Nurses" [All Fields] OR "Pediatric Oncology Nursing" [All Fields] OR "Pediatric Hematology/Oncology Nurses" [All Fields]))

#3 #1 AND #2

**C- CONCEPT:**

#4 ((Clinical Competence [MeSH Terms] OR Competency, Clinical [All Fields] OR "Competence, Clinical" [All Fields] OR "Clinical Competency" [All Fields] OR "Clinical Competencies" [All Fields] OR "Competencies, Clinical" [All Fields] OR "Clinical Skills" [All Fields] OR "Skills, Clinical" [All Fields] OR "Professional Competence" [MeSH Terms] OR "Competence, Professional" [All Fields] OR "Generalization of Expertise" [All Fields] OR "Technical Expertise" [All Fields] OR "Expertise, Technical" [All Fields] OR "Competency-Based Education" [MeSH Terms] OR "Competency Based Education" [All Fields] OR "Education, Competency-Based" [All Fields] OR "Education, Competency Based" [All Fields]))

## C: CONTEXT

#5 ((Curriculum [MeSH Terms] OR Curricula [All Fields] OR "Training Programs" [All Fields] OR "Program, Training" [All Fields] OR "Programs, Training" [All Fields] OR "Literacy Programs" [All Fields] OR "Literacy Program" [All Fields] OR "Program, Literacy" [All Fields] OR "Programs, Literacy" OR "Professional Education" [All Fields] OR "Education, Nursing" [MeSH Terms] OR "Nursing Education" [All Fields] OR "Education, Nursing, Continuing" [MeSH Terms] OR "Post-Registration Nursing Education" [All Fields] OR "Post-Basic Nursing Education" [All Fields] OR "Education, Post-Basic Nursing" [All Fields] OR "Post Basic Nursing Education" [All Fields] OR "Continuing Nursing Education" [All Fields] OR "Nursing Education Continuing" [All Fields] OR "Education, Nursing, Graduate" [MeSH Terms] OR "Nursing Education, Graduate" [All Fields] OR "Postgraduate Nursing Education" [All Fields] OR "Graduate Nursing Education" [All Fields] OR "Nursing Education Research" [MeSH Terms] OR "Nursing Research, Education" [All Fields] OR "Education Nursing Research" [All Fields] OR "Education Research, Nursing" [All Fields] OR "Research, Nursing Education" [All Fields] OR "Nursing Research" [MeSH Terms] OR "Research Nursing" [All Fields] OR "Advanced Practice Nursing" [MeSH Terms] OR "Nursing, Advanced Practice" [All Fields] OR "Practice Nursing, Advanced" [All Fields] OR "Nurse's Role" [MeSH Terms] OR "Role, Nurses" [All Fields] OR "Nurse's Scope of Practice" [All Fields]))

#6 #3 AND (#4 OR #5)

In this phase of the search strategy, the EndNote™ reference manager will be used to store, organize and delete duplicates in order to ensure a systematic, comprehensive and manageable search.

### Eligibility and study selection criteria

- *Inclusion criteria:* primary studies, experience reports, guidelines, manuals, dissertations and theses related to the essential competencies to support quality Nursing practice in Paediatric Oncology internationally, mainly in Latin America will be included. No date or language restriction will be set for the study selection.
- *Exclusion criteria:* studies focusing on Oncology Nursing Practice involving adult and elderly populations will be excluded.

Two reviewers (LCLJ and EBSM) will also select the studies through an independent and blind manner. After this selection, a third reviewer (RAGL) will be responsible for analyzing and deciding on the inclusion or exclusion of each article, especially in case of conflicting decisions. In this stage of inclusion and exclusion of the articles in the sample, the Rayyan™<sup>18</sup> application will support the archiving, organizing and selecting articles.



## Data collection

Two reviewers (LCLJ and RAGL) will independently extract data from each included study based on previously published extraction forms.<sup>13,15,19–22</sup> The expected date of completion of this scoping review will be May 2022. Information to be extracted includes a) identification of the study and objectives; b) study population and baseline characteristics; c) study design; d) recruitment methods; e) sample size; f) outcomes; g) main findings; h) clinical and epidemiological significance; i) conclusions, j) implications.<sup>13,15,19–22</sup>

## Methodological appraisal of included studies

For the classification of the selected studies, we will use the hierarchy of evidence.<sup>23</sup> This classification is divided in seven hierarchical levels, as described in Chart 1.

| Evidence level | Study design                                                                                      |
|----------------|---------------------------------------------------------------------------------------------------|
| I              | Evidence from systematic reviews or meta-analyses of randomized controlled clinical trials (RCTs) |
| II             | Evidence from a well-designed RCT                                                                 |
| III            | Evidence from well-designed controlled clinical trials without randomization (quasi-experimental) |
| IV             | Evidence from well-designed case-control, cohort or cross-sectional studies                       |
| V              | Evidence from systematic reviews of qualitative and descriptive studies                           |
| VI             | Evidence from a single descriptive or qualitative study                                           |
| VII            | Evidence from the opinion of authorities and/or reports of expert committees                      |

**Chart 1.** Hierarchy of evidence.

Two independent reviewers will assess the methodological quality of the studies, using the *JBI Critical Appraisal Checklist for Studies Reporting Prevalence Data* for quantitative studies and the *JBI Critical Appraisal Checklist tool for qualitative studies*.<sup>13</sup> Disagreements will be addressed with a third reviewer.

## Data analysis and presentation

A flowchart diagram (Figure 1) will describe the entire study selection process.<sup>24</sup>

<Figure 1. PRISMA flowchart.>

Our findings will be presented through tables, charts, narrative summaries, and will be assessed based on the type of data charted and the outcomes. To outline the networks of relationships between the keywords and the included references, a graphic map will be generated using VOSviewer® - a useful software for visualizing bibliometric networks. In addition, the significance of these findings will be considered insofar as they relate to the guiding question, and consolidate the available evidence for the scope of practice in Paediatric Oncology Nursing in Latin America, based on the essential competencies to be incorporated into clinical practice, education and research settings.

## **ETHICS AND DISSEMINATION**

This study involves neither human participants nor unpublished primary data. As such, ethics approval from a human research ethics committee is not required. Plans for the dissemination of this study comprise peer-reviewed publication and conference presentations, to be shared with International Oncology Societies and International Nursing Societies and advisory groups to inform discussions on future research.

### **Patient and public involvement**

This study protocol analyses existing research studies, and therefore involves no patients or members of the public.

### **Data availability statement**

Data are available upon reasonable request.

### **Implications**

To the best of our knowledge, this will be the first scoping review to look specifically at the Essential Core Competences to support quality paediatric oncology nursing practice internationally, mainly in Latin America. We expect that our results will be of interest to nurse practitioners, Nursing and Oncology Societies, especially, Paediatric Oncology Nurses and Paediatric Hematology/Oncology Nurses and nurse scholars concerned with this particular issue in order to inform advisory group discussions on future research as well as to contributing to Nursing education institutions, regulatory organizations and public health policies for the control of childhood cancer.

## Acknowledgements

The authors gratefully acknowledge the strong support of the Pan American Health Organization (PAHO) and World Health Organization for CureAll framework: WHO global initiative for childhood cancer.

## Contributorship statement:

Conceptualization: LCLJ and RAGL

Methodology: LCLJ

Resources: RAGL

Acquisition/interpretation of data for the work: LCLJ, RAGL, EBSM, KCBR, SFA, CES, MA, LSW and LVP.

Supervision: LCLJ and RAGL

Writing – original draft: LCLJ, EBSM, and RAGL

Writing – review & editing, and approving the final version: LCLJ, RAGL, EBSM, KCBR, SFA, CES, MA, LSW and LVP. All authors have approved and contributed to the final written manuscript.

Guarantors: LCLJ and RAGL

**Competing interests:** None declared.

**Funding:** No financial support.

**Data availability statement:** Data are available upon reasonable request.

**Ethics approval:** Not applicable.

## REFERENCES

1. Bray F, Ferlay J, Soerjomataram I, Siegel RL, Torre LA, Jemal A. Global cancer statistics 2018: GLOBOCAN estimates of incidence and mortality worldwide for 36 cancers in 185 countries. *CA Cancer J Clin*. 2018 Nov;68(6):394-424. doi: 10.3322/caac.21492.
2. GBD 2017 Childhood Cancer Collaborators. The global burden of childhood and adolescent cancer in 2017: an analysis of the Global Burden of Disease Study 2017. *Lancet Oncol*. 2019 Sep;20(9):1211-1225. doi: 10.1016/S1470-2045(19)30339-0.

3. Guzman C PC, Cordoba MA, Godoy N, Castaño A, Ribeiro KB, Moreno F, de Vries E. Childhood cancer in Latin America: from detection to palliative care and survivorship. *Cancer Epidemiol.* 2021 Apr;71(Pt B):101837. doi: 10.1016/j.canep.2020.101837.
4. Day S, Challinor J, Hollis R, Abramovitz L, Hanaratri Y, Punjwani R. Paediatric oncology nursing care in low-and middle-income countries: a need for baseline standards. *Cancer Control.* 2015;2015:111-6.
5. Day S, Hollis R, Challinor J, Bevilacqua G, Bosomprah E; SIOP PODC Nursing Working Group. Baseline standards for paediatric oncology nursing care in low to middle income countries: position statement of the SIOP PODC Nursing Working Group. *Lancet Oncol.* 2014 Jun;15(7):681-2. doi: 10.1016/S1470-2045(14)70213-X.
6. Sullivan CE, Morrissey L, Day SW, Chen Y, Shirey M, Landier W. Predictors of Hospitals' Nonachievement of Baseline Nursing Standards for Pediatric Oncology. *Cancer Nurs.* 2020 Jul/Aug;43(4):E197-E206. doi: 10.1097/NCC.0000000000000688.
7. World Health Organization. *State of the world's nursing 2020: Investing in education, jobs and leadership.* 2020. Available in <<https://apps.who.int/iris/handle/10665/331677>>
8. The Lancet. 2020: unleashing the full potential of nursing. *Lancet.* 2019 Nov 23;394(10212):1879. doi: 10.1016/S0140-6736(19)32794-1.
9. The Lancet. The status of nursing and midwifery in the world. *Lancet.* 2020 Apr 11;395(10231):1167. doi: 10.1016/S0140-6736(20)30821-7.
10. Bolina AF, Bomfim E, Lopes-Júnior LC. Frontline Nursing Care: The COVID-19 Pandemic and the Brazilian Health System. *SAGE Open Nurs.* 2020 Oct 6;6:2377960820963771. doi: 10.1177/2377960820963771.
11. Lopes-Júnior LC. Advanced Practice Nursing and the Expansion of the Role of Nurses in Primary Health Care in the Americas. *SAGE Open Nurs.* 2021 May 24;7:23779608211019491. doi: 10.1177/23779608211019491.
12. Arksey H, O'Malley L. Scoping studies: Towards a methodological framework. *Int J Soc Res Methodol Theory Pract.* 2005;8(1):19–32. <https://doi.org/10.1080/1364557032000119616>.
13. Peters MDJ, Godfrey C, McInerney P, Munn Z, Tricco AC, Khalil, H. Chapter 11: Scoping Reviews (2020 version). In: Aromataris E, Munn Z (Editors). *JB*

- 1  
2  
3 Manual for Evidence Synthesis, JBI, 2020. <https://doi.org/10.46658/JBIMES->  
4 20-12.  
5  
6  
7 14. Tricco AC, Lillie E, Zarin W, O'Brien KK, Colquhoun H, Levac D, et al.  
8 PRISMA Extension for Scoping Reviews (PRISMA-ScR): Checklist and  
9 Explanation. *Ann Intern Med.* 2018; 169(7):467–73.  
10 <https://doi.org/10.7326/M18-0850>.  
11  
12  
13 15. Lopes-Júnior LC, Bomfim EO, Nascimento LC, Nunes MD, Pereira-da-Silva  
14 G, Lima RA. Non-pharmacological interventions to manage fatigue and  
15 psychological stress in children and adolescents with cancer: an integrative  
16 review. *Eur J Cancer Care (Engl).* 2016 Nov;25(6):921-935.  
17 <https://doi.org/10.1111/ecc.12381>.  
18  
19  
20 16. Lopes-Júnior LC, Lima RAG, Olson K, Bomfim E, Neves ET, Silveira DSCD,  
21 Nunes MDR, Nascimento LC, Pereira-da-Silva G. Systematic review protocol  
22 examining the effectiveness of hospital clowns for symptom cluster  
23 management in paediatrics. *BMJ Open.* 2019 Jan 21;9(1):e026524. doi:  
24 10.1136/bmjopen-2018-026524.  
25  
26  
27 17. Lopes-Júnior LC, Siqueira PC, Maciel ELN. School reopening and risks  
28 accelerating the COVID-19 pandemic: A systematic review and meta-analysis  
29 protocol. *PLoS One.* 2021 Nov 17;16(11):e0260189. doi:  
30 10.1371/journal.pone.0260189. PMID: 34788344.  
31  
32  
33 18. Ouzzani M, Hammady H, Fedorowicz Z, Elmagarmid A. Rayyan-a web and  
34 mobile app for systematic reviews. *Syst Rev.* 2016 Dec 5;5(1):210. doi:  
35 10.1186/s13643-016-0384-4.  
36  
37  
38 19. Lopes-Júnior LC, Rosa MADRP, Lima RAG. Psychological and Psychiatric  
39 Outcomes Following PICU Admission: a systematic review of cohort studies.  
40 *Pediatr Crit Care Med.* 2018; 19(1):e58-e67.  
41 <https://doi.org/doi:10.1097/PCC.0000000000001390>  
42  
43  
44 20. Lopes-Júnior LC, Rosa GS, Pessanha RM, Schuab SIPC, Nunes KZ, Amorim  
45 MHC. Efficacy of the complementary therapies in the management of cancer  
46 pain in palliative care: a systematic review. *Rev Lat Am Enfermagem.* 2020;  
47 28:e3377. <https://doi.org/10.1590/1518-8345.4213.3377>.  
48  
49  
50 21. Lopes-Júnior LC, Bomfim E, Olson K, Neves ET, Silveira DSC, Nunes MDR,  
51 et al. Effectiveness of hospital clowns for symptom management in  
52  
53  
54  
55  
56  
57  
58  
59  
60

- 1  
2  
3 paediatrics: systematic review of randomised and non-randomised controlled  
4 trials. *BMJ*. 2020 Dec 16;371:m4290. doi: <https://doi.org/10.1136/bmj.m4290>.  
5  
6  
7 22. Lopes-Júnior LC, Urbano IR, Schuab SIPC, Pessanha RM, Rosa GS, Lima  
8 RAG. Effectiveness of complementary therapies for the management of  
9 symptom clusters in palliative care in pediatric oncology: a systematic review.  
10 *Rev Esc Enferm USP*. 2021 May 19;55:03709.  
11  
12  
13 23. Fineout-Overholt E, Melnyk BM, Stillwell SB, Williamson KM. Evidence-  
14 based practice step by step: Critical appraisal of the evidence: part I. *Am J*  
15 *Nurs*. 2010 Jul;110(7):47-52. doi: 10.1097/01.NAJ.0000383935.22721.9c.  
16  
17  
18 24. Page MJ, McKenzie JE, Bossuyt PM, Boutron I, Hoffmann TC, Mulrow CD,  
19 et al. The PRISMA 2020 statement: an updated guideline for reporting  
20 systematic reviews. *BMJ*. 2021 Mar 29;372:n71. doi: 10.1136/bmj.n71.  
21  
22  
23  
24  
25  
26  
27  
28  
29  
30  
31  
32  
33  
34  
35  
36  
37  
38  
39  
40  
41  
42  
43  
44  
45  
46  
47  
48  
49  
50  
51  
52  
53  
54  
55  
56  
57  
58  
59  
60

PRISMA 2020 flow diagram for new systematic reviews which included searches of databases, registers and other sources

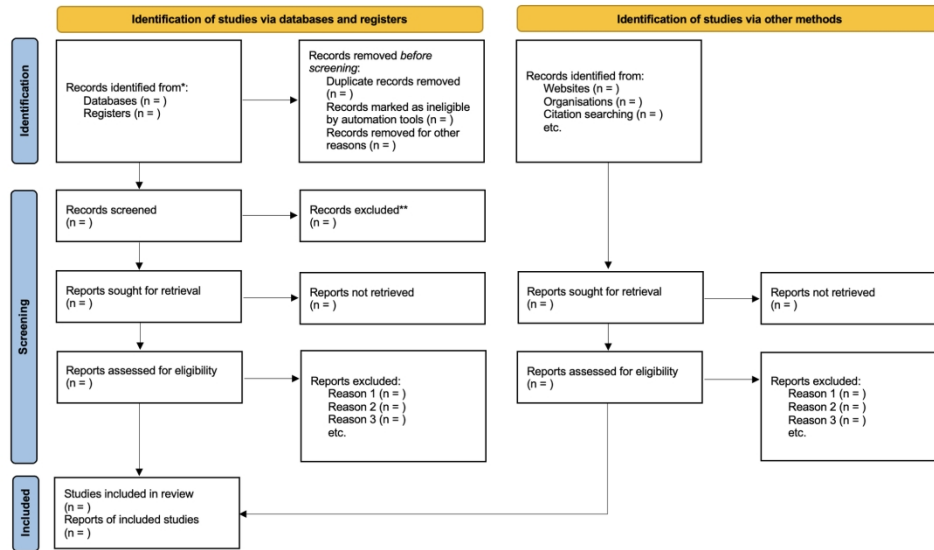

Figure 1. PRISMA flowchart.

484x284mm (118 x 118 DPI)

## PRISMA-P 2015 Checklist

This checklist has been adapted for use with protocol submissions to *Systematic Reviews* from Table 3 in Moher D et al: Preferred reporting items for systematic review and meta-analysis protocols (PRISMA-P) 2015 statement. *Systematic Reviews* 2015 4:1

| Section/topic                     | #  | Checklist item                                                                                                                                                                                  | Information reported                |                                     | Page number(s) |
|-----------------------------------|----|-------------------------------------------------------------------------------------------------------------------------------------------------------------------------------------------------|-------------------------------------|-------------------------------------|----------------|
|                                   |    |                                                                                                                                                                                                 | Yes                                 | No                                  |                |
| <b>ADMINISTRATIVE INFORMATION</b> |    |                                                                                                                                                                                                 |                                     |                                     |                |
| <b>Title</b>                      |    |                                                                                                                                                                                                 |                                     |                                     |                |
| Identification                    | 1a | Identify the report as a protocol of a systematic review                                                                                                                                        | <input checked="" type="checkbox"/> | <input type="checkbox"/>            | 1              |
| Update                            | 1b | If the protocol is for an update of a previous systematic review, identify as such                                                                                                              | <input type="checkbox"/>            | <input checked="" type="checkbox"/> | -              |
| <b>Registration</b>               | 2  | If registered, provide the name of the registry (e.g., PROSPERO) and registration number in the Abstract                                                                                        | <input checked="" type="checkbox"/> | <input type="checkbox"/>            | 2              |
| <b>Authors</b>                    |    |                                                                                                                                                                                                 |                                     |                                     |                |
| Contact                           | 3a | Provide name, institutional affiliation, and e-mail address of all protocol authors; provide physical mailing address of corresponding author                                                   | <input checked="" type="checkbox"/> | <input type="checkbox"/>            | Title Page     |
| Contributions                     | 3b | Describe contributions of protocol authors and identify the guarantor of the review                                                                                                             | <input checked="" type="checkbox"/> | <input type="checkbox"/>            | Title Page     |
| <b>Amendments</b>                 | 4  | If the protocol represents an amendment of a previously completed or published protocol, identify as such and list changes; otherwise, state plan for documenting important protocol amendments | <input checked="" type="checkbox"/> | <input type="checkbox"/>            | Title Page     |
| <b>Support</b>                    |    |                                                                                                                                                                                                 |                                     |                                     |                |
| Sources                           | 5a | Indicate sources of financial or other support for the review                                                                                                                                   | <input checked="" type="checkbox"/> | <input type="checkbox"/>            | Title Page     |
| Sponsor                           | 5b | Provide name for the review funder and/or sponsor                                                                                                                                               | <input checked="" type="checkbox"/> | <input type="checkbox"/>            | Title Page     |
| Role of sponsor/funder            | 5c | Describe roles of funder(s), sponsor(s), and/or institution(s), if any, in developing the protocol                                                                                              | <input checked="" type="checkbox"/> | <input type="checkbox"/>            | Title Page     |
| <b>INTRODUCTION</b>               |    |                                                                                                                                                                                                 |                                     |                                     |                |
| <b>Rationale</b>                  | 6  | Describe the rationale for the review in the context of what is already known                                                                                                                   | <input checked="" type="checkbox"/> | <input type="checkbox"/>            | 3              |
| <b>Objectives</b>                 | 7  | Provide an explicit statement of the question(s) the review will address with reference to participants, interventions, comparators, and outcomes (PICO)                                        | <input checked="" type="checkbox"/> | <input type="checkbox"/>            | 4              |
| <b>METHODS</b>                    |    |                                                                                                                                                                                                 |                                     |                                     |                |
| <b>Eligibility criteria</b>       | 8  | Specify the study characteristics (e.g., PICO, study design, setting, time frame) and report characteristics (e.g., years considered, language, publication status) to be used as criteria for  | <input checked="" type="checkbox"/> | <input type="checkbox"/>            | 4-6            |



| Section/topic                             | #   | Checklist item                                                                                                                                                                                                                              | Information reported                |                                     | Page number(s) |
|-------------------------------------------|-----|---------------------------------------------------------------------------------------------------------------------------------------------------------------------------------------------------------------------------------------------|-------------------------------------|-------------------------------------|----------------|
|                                           |     |                                                                                                                                                                                                                                             | Yes                                 | No                                  |                |
|                                           |     | eligibility for the review                                                                                                                                                                                                                  |                                     |                                     |                |
| <b>Information sources</b>                | 9   | Describe all intended information sources (e.g., electronic databases, contact with study authors, trial registers, or other grey literature sources) with planned dates of coverage                                                        | <input checked="" type="checkbox"/> | <input type="checkbox"/>            | 5              |
| <b>Search strategy</b>                    | 10  | Present draft of search strategy to be used for at least one electronic database, including planned limits, such that it could be repeated                                                                                                  | <input checked="" type="checkbox"/> | <input type="checkbox"/>            | 5-6            |
| <b>STUDY RECORDS</b>                      |     |                                                                                                                                                                                                                                             |                                     |                                     |                |
| Data management                           | 11a | Describe the mechanism(s) that will be used to manage records and data throughout the review                                                                                                                                                | <input checked="" type="checkbox"/> | <input type="checkbox"/>            | 7              |
| Selection process                         | 11b | State the process that will be used for selecting studies (e.g., two independent reviewers) through each phase of the review (i.e., screening, eligibility, and inclusion in meta-analysis)                                                 | <input checked="" type="checkbox"/> | <input type="checkbox"/>            | 6-7            |
| Data collection process                   | 11c | Describe planned method of extracting data from reports (e.g., piloting forms, done independently, in duplicate), any processes for obtaining and confirming data from investigators                                                        | <input checked="" type="checkbox"/> | <input type="checkbox"/>            | 7              |
| <b>Data items</b>                         | 12  | List and define all variables for which data will be sought (e.g., PICO items, funding sources), any pre-planned data assumptions and simplifications                                                                                       | <input checked="" type="checkbox"/> | <input type="checkbox"/>            | 7              |
| <b>Outcomes and prioritization</b>        | 13  | List and define all outcomes for which data will be sought, including prioritization of main and additional outcomes, with rationale                                                                                                        | <input checked="" type="checkbox"/> | <input type="checkbox"/>            | 7              |
| <b>Risk of bias in individual studies</b> | 14  | Describe anticipated methods for assessing risk of bias of individual studies, including whether this will be done at the outcome or study level, or both; state how this information will be used in data synthesis                        | <input type="checkbox"/>            | <input checked="" type="checkbox"/> | -              |
| <b>DATA</b>                               |     |                                                                                                                                                                                                                                             |                                     |                                     |                |
| <b>Synthesis</b>                          | 15a | Describe criteria under which study data will be quantitatively synthesized                                                                                                                                                                 | <input checked="" type="checkbox"/> | <input type="checkbox"/>            | 8              |
|                                           | 15b | If data are appropriate for quantitative synthesis, describe planned summary measures, methods of handling data, and methods of combining data from studies, including any planned exploration of consistency (e.g., $I^2$ , Kendall's tau) | <input type="checkbox"/>            | <input checked="" type="checkbox"/> | -              |
|                                           | 15c | Describe any proposed additional analyses (e.g., sensitivity or subgroup analyses, meta-regression)                                                                                                                                         | <input type="checkbox"/>            | <input checked="" type="checkbox"/> | -              |
|                                           | 15d | If quantitative synthesis is not appropriate, describe the type of summary planned                                                                                                                                                          | <input type="checkbox"/>            | <input checked="" type="checkbox"/> | -              |
| <b>Meta-bias(es)</b>                      | 16  | Specify any planned assessment of meta-bias(es) (e.g., publication bias across studies, selective reporting within studies)                                                                                                                 | <input type="checkbox"/>            | <input checked="" type="checkbox"/> | -              |
| <b>Confidence in cumulative evidence</b>  | 17  | Describe how the strength of the body of evidence will be assessed (e.g., GRADE)                                                                                                                                                            | <input type="checkbox"/>            | <input checked="" type="checkbox"/> | -              |

# BMJ Open

## Essential Core Competencies for scope of practice of Paediatric Oncology Nurses in Latin America: a scoping review protocol

|                                 |                                                                                                                                                                                                                                                                                                                                                                                                                                                                                                                                                                                                                                                                                                                                                          |
|---------------------------------|----------------------------------------------------------------------------------------------------------------------------------------------------------------------------------------------------------------------------------------------------------------------------------------------------------------------------------------------------------------------------------------------------------------------------------------------------------------------------------------------------------------------------------------------------------------------------------------------------------------------------------------------------------------------------------------------------------------------------------------------------------|
| Journal:                        | <i>BMJ Open</i>                                                                                                                                                                                                                                                                                                                                                                                                                                                                                                                                                                                                                                                                                                                                          |
| Manuscript ID                   | bmjopen-2022-061853.R1                                                                                                                                                                                                                                                                                                                                                                                                                                                                                                                                                                                                                                                                                                                                   |
| Article Type:                   | Protocol                                                                                                                                                                                                                                                                                                                                                                                                                                                                                                                                                                                                                                                                                                                                                 |
| Date Submitted by the Author:   | 24-May-2022                                                                                                                                                                                                                                                                                                                                                                                                                                                                                                                                                                                                                                                                                                                                              |
| Complete List of Authors:       | LOPES-JÚNIOR, LUÍS CARLOS; Universidade Federal do Espírito Santo, Nursing Department<br>Lima, Regina Aparecida Garcia; Universidade de Sao Paulo Campus de Ribeirao Preto<br>Maia, Edmara Bazoni Soares ; Universidade Federal de São Paulo, Nursing Department<br>Ribeiro, Karina de Cássia Braga ; Pan American Health Organization<br>Fuentes-Alabí, Soad ; Pan American Health Organization<br>Sullivan, Courtney E. ; The University of Alabama at Birmingham Center for Outcomes and Effectiveness Research and Education<br>Abraham, Monnie ; St Jude Children's Research Hospital, Department of Global Pediatric Medicine<br>Weber, Lorena Segovia ; Hospital Luis Calvo Mackenna<br>Ponce, Liliana Vásquez ; Pan American Health Organization |
| <b>Primary Subject Heading</b>: | Nursing                                                                                                                                                                                                                                                                                                                                                                                                                                                                                                                                                                                                                                                                                                                                                  |
| Secondary Subject Heading:      | Paediatrics                                                                                                                                                                                                                                                                                                                                                                                                                                                                                                                                                                                                                                                                                                                                              |
| Keywords:                       | Paediatric oncology < ONCOLOGY, Paediatric oncology < PAEDIATRICS, MEDICAL EDUCATION & TRAINING                                                                                                                                                                                                                                                                                                                                                                                                                                                                                                                                                                                                                                                          |
|                                 |                                                                                                                                                                                                                                                                                                                                                                                                                                                                                                                                                                                                                                                                                                                                                          |

SCHOLARONE™  
Manuscripts

***Title Page – BMJ Open***

**Essential Core Competencies for scope of practice of Paediatric Oncology Nurses in Latin America: a scoping review protocol**

**Authors:**

Luís Carlos Lopes-Júnior<sup>1</sup>, RN, OCN, Ph.D.

Regina Aparecida Garcia Lima<sup>2\*</sup>, RN, Ph.D.

Edmara Bazoni Soares Maia<sup>3</sup>, RN., CPN., Ph.D

Karina de Cássia Braga Ribeiro<sup>4</sup>, BDS, Ph.D

Soad Fuentes-Alabí<sup>4</sup>, MD

Courtney E. Sullivan<sup>5</sup>, PhD, APRN, CPNP-AC, CPHON

Monnie Abraham<sup>6</sup>, PhD, MSN, FISQua, CPHQ

Lorena Segovia Weber<sup>7</sup>, RN

Liliana Vásquez Ponce<sup>4</sup>, MD

**Affiliations and addresses:**

<sup>1</sup> Nursing Department at Federal University of Espírito Santo. Vitória, ES, Brazil.

<sup>2</sup> University of São Paulo at Ribeirão Preto College of Nursing. Ribeirão Preto, SP.

<sup>3</sup> Nursing Department at Federal University of São Paulo. São Paulo, SP, Brazil.

<sup>4</sup> Pan American Health Organization (PAHO). Washington, DC, USA.

<sup>5</sup> Center for Outcomes and Effectiveness Research and Education (COERE), The University of Alabama at Birmingham, USA.

<sup>6</sup> Department of Global Pediatric Medicine, St. Jude Children's Research Hospital, St. Jude Global, Memphis, TN, USA.

<sup>7</sup> Hospital Dr. Luis Calvo Mackenna, Santiago, Chile.

**Corresponding author:** Regina Aparecida Garcia de Lima. RN., Ph.D. Full Professor, Department of Maternal-Infant and Public Health Nursing, University of São Paulo at Ribeirão Preto College of Nursing – PAHO/WHO Collaborating Centre for Nursing Research Development, Ribeirão Preto, São Paulo, Brazil. E-mail: limare@eerp.usp.br; Phone: +5516 3315-0542. ORCID: 0000-0002-0611- 562

**Keywords:** Paediatric Oncology Nursing; Competencies; Scope of Practice; Oncology, Latin America.

**Word Count: 2528 words.**

## ABSTRACT

**Introduction:** Nurses comprise the largest group of health workers globally and are essential to the provision of care necessary for delivering curative therapy to children with cancer. In high-income countries, previous studies of the nurse workforce have shown an association between patient morbidity and mortality and nursing-related factors such as staffing, education, and the nursing practice environment. There is currently limited evidence available to define the scope of essential core competencies for paediatric oncology nursing (PON) practice internationally, and specifically in Latin America. Clearly defined essential core competencies contribute to establishing nurses' scope of practice within clinical practice, education and research settings. Here, we aimed to map and synthesize the available evidence on the scope of PON practices in the context of clinical practice, educational training and research settings in Latin America.

**Methods:** A scoping review (ScR) protocol is reported, adhering to the PRISMA-P statement and guided by The Joanna Briggs Institute. MEDLINE/PubMed, Cochrane Library; Embase; CINAHL, Web-of-Science; Scopus; Science Direct and LILACS, plus additional sources: The ProQuest Dissertation & Theses Global, The British Library, Google Scholar, medRxiv, ClinicalTrials.gov and WHO-ICTRP will be searched. No date or language restrictions will be employed. Two independent researchers will conduct all the steps of this ScR. The findings will be presented through tables, charts, narrative summaries, and assessed based on the outcomes. The search strategy will be updated in May 2022. The expected completion date for this ScR is November-2022.

**Ethics/dissemination:** This protocol does not require ethical approval. The dissemination plans comprise peer-reviewed publication and conference presentations, to be shared with International Oncology Societies/International Nursing Societies and advisory groups to inform discussions on future research. We expect that our results will be of interest to nurse professionals, especially, PON and nurse scholars concerned with this particular issue.

**Open Science Framework Registration:** [osf.io/24sv9](https://osf.io/24sv9)

### Strengths and limitations of this study

- To the best of our knowledge this will be the first scoping review that will synthesise the scope of practice of Paediatric Oncology Nurses in Latin America.
- The review will adopt a rigorous approach, adhering to PRISMA-ScR guidelines, using a comprehensive and systematic search strategy, including all study designs, grey literature, pre-prints, with no time period or language restrictions.
- This protocol includes clearly defined inclusion criteria aligned with the *Population, Concept and Context* strategy according to the updated JBI Manual for Evidence Synthesis, 2020.

- The paucity of literature addressing the scope of practice of Paediatric Oncology Nurses may limit findings, specifically factors associated with regulatory frameworks of the profession in different Latin American countries.

## INTRODUCTION

As the battle against childhood and adolescent cancer continues to become a global concern, capacity-building initiatives to improve survival and outcomes in resource-constrained locations will be increasingly prioritized.<sup>1-3</sup> As such, it is important to identify essential core competencies to ensure that paediatric oncology nurses have the knowledge, skills, attitudes and other characteristics deemed necessary for safe and effective professional practice. The identification of these competencies will help to determine the scope of subspecialty nursing practice, promote competent workforces, facilitate professional mobility, and aid in comparative evaluation of the profession and professionals' experiences at a regional level.

Nurses constitute the largest group of health professionals worldwide<sup>4-8</sup> and are key to the provision of optimal care for children and adolescents with cancer. In high-income countries, previous studies<sup>9-10</sup> on the nursing workforce have shown an association between patient morbidity and mortality and factors related to nursing, such as dimensioning nursing staff, education and specialized nursing practice. Although specialization has been associated with better patient outcomes, in many countries paediatric oncology is just now emerging as a recognized subspecialty. Available evidence on the scope of professional practice through essential competencies to support quality nursing practice in paediatric oncology internationally, especially in Latin America, is still incipient.<sup>11</sup> To effectively build paediatric oncology nursing capacity, essential core competencies reflective of nurses' scope of practice must be identified and incorporated into clinical practice, education, and research.

## Background

1  
2  
3 Nursing is the most numerous category of health human resources in most of  
4 countries.<sup>4</sup> Recent estimates indicate that the total nursing workforce is 27.9 million  
5 professionals, with more than 80% in countries that represent half of the world's  
6 population. The Region of the Americas has 8.4 million professionals (approximately  
7 30% of the global total), with 87% located in Brazil, Canada, and the United States of  
8 America (USA), which represent approximately 57% of the region's population.<sup>4</sup>  
9

10  
11  
12 Regarding the distribution of human resources in Nursing, it is heterogeneous  
13 both within and between the countries of the Region of the Americas. The proportion of  
14 nurses as well as nursing technicians/10,000 inhabitants varies from 3.5 in Haiti to  
15 111.4 in the USA. In half of the countries, the ratio of nurses/10 thousand inhabitants is  
16 less than or equal to 10.4, however, there is variation, and it should be considered that  
17 Canada (106.2), the USA (111.4) and Cuba (81.3) has the highest proportions of nurses  
18 per 10,000 inhabitants.<sup>12</sup> In one hand, the USA, Canada and some Caribbean Islands,  
19 there are 4 nurses/doctor. In the other hand, Guyana, Mexico and Suriname, this ratio is  
20 1.1 to 1.8 nurses/doctor, while in Colombia, Chile, El Salvador, Guatemala, Honduras,  
21 Peru, Dominican Republic and Venezuela, the ratio can be less than one nurse per  
22 physician.<sup>12-13</sup>  
23  
24  
25  
26  
27  
28  
29  
30  
31

32  
33 One of the strategies proposed by the World Health Organization to improve the  
34 delivery of health services and achieve the Sustainable Development Goals is to review  
35 the roles of professionals.<sup>14</sup> Countries that have new roles for nurses improve access and  
36 coverage in certain areas where medical resources are limited.<sup>14-16</sup>  
37  
38

39  
40 Nurses, in particular, those caring for cancer patients had to quickly learn how to  
41 integrate new knowledge and new technologies into their daily work, often in a context  
42 where this population has multiple comorbidities.<sup>17</sup> The improvement in the survival  
43 rate of children and adolescents with cancer since the 1970s is notorious, considering  
44 the differences between countries. The best indicators reflect advances in therapy,  
45 diagnostic tests, improvement in supportive care<sup>18-21</sup> and nursing care<sup>22-23</sup>. Hence, it is  
46 up to the nurse to act in prevention, disease control and quality of life actions.  
47  
48 Therefore, they must have the skills to care for all stages of the therapeutic diagnostic  
49 process (diagnostic evaluation, treatment, rehabilitation, and care for family  
50 members).<sup>24</sup>  
51  
52  
53  
54  
55

56  
57 Pediatric oncology is a highly specialized field that requires critical thinking and  
58 technical skills to safely deliver cancer-targeted treatment regimens, supportive care,  
59 and monitor patient deterioration within the context of family-centered care.<sup>24</sup> (Sullivan,  
60

2021). Still, the practice of pediatric oncology nurses requires extensive knowledge (art and science of nursing), strong critical thinking, problem-solving skills, decision-making and a high degree of compassion and sensitivity towards children, adolescents, young adults, their families, and their community.<sup>25</sup>

Accompanying this specificity of the care process, there is a growing need for nurses with specialized knowledge, skills, and experience, in positions where they can develop and supervise clinical nursing practice, guide the education and training of the health team and patients and families and lead nursing research.<sup>26</sup>

Nursing in Pediatric Oncology and Hematology transposes itself as a dynamic and evolving area of action, which is based on knowledge derived from theory, research, and practice. It is not just the knowledge that the pediatric nurse acquires, but the application of this knowledge and the ability to apply it with art and science in the care of children, adolescents, young adults, and their families.<sup>25</sup>

Based on this definition and the scope of practice, pediatric oncology nurses are professionals specialized in nursing care for children and adolescents with cancer and their families. For this practice, specialist nurses articulate compassionate, non-traumatic, complex, continuous, ethical, aesthetic and child-, adolescent- and family-centered care to meet the physical, emotional, psychosocial, and cultural needs of those involved. In carrying out their work, they use evidence-based best practices and are guided by the best interests of their clients.

The work of the pediatric oncology nurse is organized from central constructs such as evidence-based practice, nursing theories, scientificity of care, autonomy, empowerment, management/management of the work process, education/literacy in health, which permeate the scope of its practice that must be aligned with the real health needs of patients and families involved in this process. Thus, the need to search for the development of professional competences to exercise a qualified and safe care is pivotal. The concept of competencies encompasses knowledge, skills and attitudes that support the provision of adequate and evidence-based care. It also encompasses, for a safe practice in any environment along the health care continuum, the principles of respect and preservation of dignity.<sup>27</sup>

Regarding the regulation of professional practice, in some countries its absence causes widespread dissatisfaction and abandonment of the profession. For this reason, it recommends that the regulation of the exercise of health professions be implemented and respected in line with the social, cultural and health system characteristics in each

country.<sup>28</sup> The need to discuss the regulatory frameworks of the profession in different countries is urgent. The International Council of Nurses (ICN) has maintained a clear position on the importance of regulation to ensure safe and competent nursing practice to protect the public from receiving safe and ethical nursing care provided by competent nurses.<sup>29</sup> Professional regulatory systems are influenced and shaped by the legislative, political, environmental, social, cultural, and professional context in which they are developed and that some form of nursing regulation exists in much of the world, although not in all countries or regions. In some Latin American and Caribbean countries, there is no regulation of professional practice. However, in others countries they have only minimal regulatory frameworks or are just beginning to create regulatory mechanisms. In addition, in some countries there may be long standing regulatory systems but not all are up to date with contemporary practice and thinking.<sup>29</sup>

## RESEARCH AIM

To map and synthesize the available evidence on the scope of paediatric oncology nursing practices in the context of clinical practice, educational training and research settings in Latin America.

## METHODS

### Study design

This scoping review will be reported following the *Preferred Reporting Items for Systematic Review and Meta-Analyses extension for Scoping Reviews* (PRISMA-ScR)<sup>30</sup> and is in line with the *Joanna Briggs Institute (JBI) Manual for Evidence Synthesis*.<sup>31</sup>

There are a number of reasons why a scoping review might be conducted. Unlike other reviews that tend to address relatively precise questions (such as a systematic review of the effectiveness of an intervention assessed using a predefined set of outcomes), scoping reviews can be used to map the key concepts that underpin a field of research, as well as to clarify working definitions, and/or the conceptual boundaries of a topic.<sup>32</sup> A scoping review of scoping reviews found that the three most common reasons for conducting a scoping review were to explore the breadth or extent of the literature, map and summarize the evidence, and inform future research.<sup>33</sup> The



1  
2  
3 indications for scoping reviews includes: a) As a precursor to a systematic review; b) To  
4 identify the types of available evidence in a given field; c) To identify and analyse  
5 knowledge gaps; d) To clarify key concepts/ definitions in the literature; e) To examine  
6 how research is conducted on a certain topic or field; f) To identify key characteristics  
7 or factors related to a concept.<sup>34</sup>  
8  
9

10  
11 Steps of the scoping review include the: 1) Definition and alignment of  
12 objectives and the research question; 2) elaboration of the inclusion criteria according to  
13 the objective(s) and the guiding question; 3) description of the planned approach to the  
14 evidence search, selection, data extraction and presentation of evidence; 4) search for  
15 evidence; 5) selection of evidence; 6) extraction of evidence; 7) analysis of evidence; 8)  
16 presentation of results and 9) synthesis of evidence in relation to review, conclusions  
17 and implications of the results.<sup>31</sup>  
18  
19  
20  
21  
22  
23

24 To guarantee data reliability and methodological transparency of this review, the  
25 protocol was submitted for evaluation and registration in the *Open Science Framework*  
26 (*OSF / Center for Open Science/USE*). Approval was obtained on 15/08/2021 (Register  
27 ID: osf.io/24sv9). To formulate the review question, we have used the PCC strategy<sup>31</sup>  
28 (*P – Population; C – Concept; C – Context;*), where P = Population (certified paediatric  
29 oncology nurse), C = Concept (essential core competencies in paediatric oncology), C =  
30 Context (clinical practice, education and research). This strategy facilitated structured  
31 critical reasoning on the topic and the formulation of the following review question:  
32 "*What are the essential competencies for Paediatric Oncology Nursing in the context of*  
33 *clinical practice, educational training and research settings in Latin America?*"  
34  
35  
36  
37  
38  
39  
40  
41  
42  
43  
44  
45

### 46 Search strategy

47 The literature search will be carried out systematically in eight electronic  
48 databases: *Medical Literature Analysis and Retrieval System Online* (MEDLINE)  
49 through *PubMed*, *Cochrane Library*, *EMBASE*, *Cumulative Index to Nursing and Allied*  
50 *Health Literature* (CINAHL), *Web of Science*, SCOPUS, Science Direct and *Latin*  
51 *American and Caribbean Health Sciences Literature* (LILACS). The search strategy for  
52 the studies will consist of a combination of controlled descriptors (indexers in the  
53 respective databases) and keywords, according to the indication offered in each  
54 electronic database. It is emphasized that there will be no date or language restriction in  
55  
56  
57  
58  
59  
60

1  
2  
3 the search strategy to be carried out. In addition to the electronic databases mentioned  
4 above, secondary searches will be carried out in a variety of other sources, such as in  
5 *ProQuest Dissertations and Theses Global, The British Library and Google Scholar*  
6 *and Preprints for Health Sciences [medRxiv], ClinicalTrials.gov and WHO*  
7 *International Clinical Trials Registry Platform*. Furthermore, the list of final references  
8 in the included primary studies will be manually analyzed to find relevant studies to be  
9 added. Two researchers will perform the search strategy independently, according to the  
10 recommendations of the JBI guidelines.<sup>13</sup> Initially, we will identify the existence of an  
11 index of specific subject titles in each database (such as *MeSH terms, CINAHL*  
12 *Headings, Entree terms* and the DeCS) and their synonyms (keywords). Subsequently,  
13 the search terms were combined using the Boolean operators "AND" and "OR".<sup>35-37</sup> The  
14 search strategy that combines the controlled descriptors and keywords used in each  
15 database is depicted on the **Supplementary File 1**.

16  
17 In this phase of the search strategy, the EndNote™ reference manager will be  
18 used to store, organize and delete duplicates in order to ensure a systematic,  
19 comprehensive and manageable search.

### 20 21 22 **Eligibility and study selection criteria**

- 23 ● *Inclusion criteria:* primary studies, experience reports, guidelines, manuals,  
24 dissertations and theses related to the essential competencies to support quality  
25 Nursing practice in Paediatric Oncology internationally, mainly in Latin  
26 America will be included. No date or language restriction will be set for the  
27 study selection.
- 28 ● *Exclusion criteria:* studies focusing on Oncology Nursing Practice involving  
29 adult and elderly populations will be excluded.

30  
31  
32  
33  
34  
35  
36  
37  
38  
39  
40  
41  
42  
43  
44  
45  
46  
47  
48  
49  
50  
51  
52  
53  
54  
55  
56  
57  
58  
59  
60  
Two reviewers (LCLJ and EBSM) will also select the studies through an  
independent and blind manner. After this selection, a third reviewer (RAGL) will be  
responsible for analyzing and deciding on the inclusion or exclusion of each article,  
especially in case of conflicting decisions. In this stage of inclusion and exclusion of the  
articles in the sample, the Rayyan™<sup>38</sup> application will support the archiving, organizing  
and selecting articles.

## Data collection

Two reviewers (LCLJ and RAGL) will independently extract data from each included study based on previously published extraction forms.<sup>31,35,39–42</sup> The expected date of completion of this scoping review will be May 2022. Information to be extracted includes a) identification of the study and objectives; b) study population and baseline characteristics; c) study design; d) recruitment methods; e) sample size; f) outcomes; g) main findings; h) clinical and epidemiological significance; i) conclusions, j) implications.<sup>31,35,139–42</sup>

## Methodological appraisal of included studies

For the classification of the selected studies, we will use the hierarchy of evidence.<sup>43</sup> This classification is divided in seven hierarchical levels, as described in Chart 1.

| Evidence level | Study design                                                                                      |
|----------------|---------------------------------------------------------------------------------------------------|
| I              | Evidence from systematic reviews or meta-analyses of randomized controlled clinical trials (RCTs) |
| II             | Evidence from a well-designed RCT                                                                 |
| III            | Evidence from well-designed controlled clinical trials without randomization (quasi-experimental) |
| IV             | Evidence from well-designed case-control, cohort or cross-sectional studies                       |
| V              | Evidence from systematic reviews of qualitative and descriptive studies                           |
| VI             | Evidence from a single descriptive or qualitative study                                           |
| VII            | Evidence from the opinion of authorities and/or reports of expert committees                      |

**Chart 1.** Hierarchy of evidence.

## Data analysis and presentation

A flowchart diagram (Figure 1) will describe the entire study selection process.<sup>44</sup>

<Figure 1. PRISMA flowchart.>

Our findings will be presented through tables, charts, narrative summaries, and will be assessed based on the type of data charted and the outcomes. To outline the networks of relationships between the keywords and the included references, a graphic map will be

generated using VOSviewer® - a useful software for visualizing bibliometric networks. In addition, the significance of these findings will be considered insofar as they relate to the guiding question, and consolidate the available evidence for the scope of practice in Paediatric Oncology Nursing in Latin America, based on the essential competencies to be incorporated into clinical practice, education and research settings.

### **Limitations**

The paucity of literature addressing the scope of practice of Paediatric Oncology Nurses may limit findings, specifically factors associated with regulatory frameworks of the profession in different Latin American countries.

### **ETHICS AND DISSEMINATION**

This study involves neither human participants nor unpublished primary data. As such, ethics approval from a human research ethics committee is not required. Plans for the dissemination of this study comprise peer-reviewed publication and conference presentations, to be shared with International Oncology Societies and International Nursing Societies and advisory groups to inform discussions on future research. Authors are finalizing/updating the search strategy in May 2022 and preparing to conduct the review. The aim is to complete the review by November-2022.

### **Patient and public involvement**

This study protocol analyses existing research studies, and therefore involves no patients or members of the public.

### **Data availability statement**

Data are available upon reasonable request.

### **Implications**

To the best of our knowledge, this will be the first scoping review to look specifically at the Essential Core Competences to support quality paediatric oncology nursing practice internationally, mainly in Latin America. We expect that our results will be of interest to nurse practitioners, Nursing and Oncology Societies, especially, Paediatric Oncology Nurses and Paediatric Hematology/Oncology Nurses and nurse scholars concerned with

1  
2  
3 this particular issue in order to inform advisory group discussions on future research as  
4 well as to contributing to Nursing education institutions, regulatory organizations and  
5 public health policies for the control of childhood cancer.  
6  
7  
8  
9

### 10 **Acknowledgements**

11 The authors gratefully acknowledge the strong support of the Pan American Health  
12 Organization (PAHO) and World Health Organization for CureAll framework: WHO  
13 global initiative for childhood cancer.  
14  
15  
16  
17

### 18 **Contributorship statement:**

19 Conceptualization: LCLJ and RAGL

20 Methodology: LCLJ

21 Resources: RAGL

22 Acquisition/interpretation of data for the work: LCLJ, RAGL, EBSM, KCBR, SFA,  
23 CES, MA, LSW and LVP.  
24

25 Supervision: LCLJ and RAGL

26 Writing – original draft: LCLJ, EBSM, and RAGL

27 Writing – review & editing, and approving the final version: LCLJ, RAGL, EBSM,  
28 KCBR, SFA, CES, MA, LSW and LVP. All authors have approved and contributed to  
29 the final written manuscript.  
30

31 Guarantors: LCLJ and RAGL

32 **Competing interests:** None declared.

33 **Funding:** No financial support.

34 **Data availability statement:** Data are available upon reasonable request.

35 **Ethics approval:** Not applicable.  
36  
37  
38  
39

### 40 **REFERENCES**

- 41 1. Sung H, Ferlay J, Siegel RL, Laversanne M, Soerjomataram I, Jemal A, Bray F.  
42 Global Cancer Statistics 2020: GLOBOCAN Estimates of Incidence and  
43 Mortality Worldwide for 36 Cancers in 185 Countries. CA Cancer J Clin. 2021  
44 May;71(3):209-249.  
45
- 46 2. GBD 2017 Childhood Cancer Collaborators. The global burden of childhood  
47 and adolescent cancer in 2017: an analysis of the Global Burden of Disease  
48  
49  
50  
51  
52  
53  
54  
55  
56  
57  
58  
59  
60

- 1  
2  
3 Study 2017. *Lancet Oncol.* 2019 Sep;20(9):1211-1225. doi: 10.1016/S1470-  
4 2045(19)30339-0.  
5  
6  
7 3. Guzman C PC, Cordoba MA, Godoy N, Castaño A, Ribeiro KB, Moreno F, de  
8 Vries E. Childhood cancer in Latin America: from detection to palliative care  
9 and survivorship. *Cancer Epidemiol.* 2021 Apr;71(Pt B):101837. doi:  
10 10.1016/j.canep.2020.101837.  
11  
12 4. World Health Organization. State of the world's nursing 2020: Investing in  
13 education, jobs and leadership. 2020. Available in  
14 <<https://apps.who.int/iris/handle/10665/331677>>  
15  
16 5. The Lancet. 2020: unleashing the full potential of nursing. *Lancet.* 2019 Nov  
17 23;394(10212):1879. doi: 10.1016/S0140-6736(19)32794-1.  
18  
19 6. The Lancet. The status of nursing and midwifery in the world. *Lancet.* 2020 Apr  
20 11;395(10231):1167. doi: 10.1016/S0140-6736(20)30821-7.  
21  
22 7. Bolina AF, Bomfim E, Lopes-Júnior LC. Frontline Nursing Care: The COVID-  
23 19 Pandemic and the Brazilian Health System. *SAGE Open Nurs.* 2020 Oct  
24 6;6:2377960820963771.  
25  
26 8. Lopes-Júnior LC. Advanced Practice Nursing and the Expansion of the Role of  
27 Nurses in Primary Health Care in the Americas. *SAGE Open Nurs.* 2021 May  
28 24;7:23779608211019491.  
29  
30 9. Day S, Challinor J, Hollis R, Abramovitz L, Hanaratri Y, Punjwani R. Paediatric  
31 oncology nursing care in low-and middle-income countries: a need for baseline  
32 standards. *Cancer Control.* 2015;2015:111-6.  
33  
34 10. Day S, Hollis R, Challinor J, Bevilacqua G, Bosomprah E; SIOP PODC Nursing  
35 Working Group. Baseline standards for paediatric oncology nursing care in low  
36 to middle income countries: position statement of the SIOP PODC Nursing  
37 Working Group. *Lancet Oncol.* 2014 Jun;15(7):681-2.  
38  
39 11. Sullivan CE, Morrissey L, Day SW, Chen Y, Shirey M, Landier W. Predictors  
40 of Hospitals' Nonachievement of Baseline Nursing Standards for Pediatric  
41 Oncology. *Cancer Nurs.* 2020 Jul/Aug;43(4):E197-E206.  
42  
43 12. Crisp N, Chen L. Global supply of health professionals. *N Engl J Med.* 2014  
44 Mar 6;370(10):950-7.  
45  
46 13. World Health Organization (2018). Expanding the roles of nurses in primary  
47 health care. <https://iris.paho.org/handle/10665.2/34958>  
48  
49  
50  
51  
52  
53  
54  
55  
56  
57  
58  
59  
60

14. World Health Organization. (2017). Report of the policy dialogue meeting on the nursing workforce. <https://www.who.int/hrh/news/2017/NursingApril2017-2.pdf>
15. Oldenburger D, De Bortoli Cassiani SH, Bryant-Lukosius D, Valaitis RK, Baumann A, Pulcini J, Martin-Misener R. Implementation strategy for advanced practice nursing in primary health care in Latin America and the Caribbean. *Rev Panam Salud Publica*. 2017 Jun 8;41:e40.
16. Lopes Júnior LC, Lazarini WS, Coqueiro JM. Universal health system based on Primary Care and advanced practice nursing. *Rev Bras Enferm*. 2022 May 11;75(5):e20210403.
17. Sarfati, D., Koczwara, B., & Jackson, C. (2016). The impact of comorbidity on cancer and its treatment. *CA: a Cancer Journal for Clinicians*, 66(4), 337–350. <https://doi.org/10.3322/caac.21342>
18. Gupta S, Howard SC, Hunger SP, et al. Treating Childhood Cancer in Low- and Middle-Income Countries. In: Gelband H, Jha P, Sankaranarayanan R, et al., editors. *Cancer: Disease Control Priorities, Third Edition (Volume 3)*. Washington (DC): The International Bank for Reconstruction and Development / The World Bank; 2015 Nov 1. Chapter 7. Available from: <https://www.ncbi.nlm.nih.gov/books/NBK343626/> doi: 10.1596/978-1-4648-0349-9\_ch7
19. Lopes-Júnior LC, Olson K, de Omena Bomfim E, Pereira-da-Silva G, Nascimento LC, de Lima RA. Translational research and symptom management in oncology nursing. *Br J Nurs*. 2016 May 26-Jun 8;25(10):S12, S14, S16 passim.
20. Lopes-Júnior LC, Lima RAG. Cancer care and interdisciplinary practice. *Cad Saude Publica*. 2019;35(1):e00193218.
21. Lopes-Júnior LC. Personalized Nursing Care in Precision-Medicine Era. *SAGE Open Nurs*. 2021 Dec 9;7:23779608211064713.
22. Gustafsson, G., Heyman, M., & Vernby, Å. (2007). Childhood cancer incidence and survival in Sweden 1984-2005. Karolinska Institute.
23. Lopes-Júnior LC, Tuma MC, Amorim MHC. Psychoneuroimmunology and oncology nursing: a theoretical study. *Rev Esc Enferm USP*. 2021 Sep 10;55:e20210159.

- 1  
2  
3  
4  
5  
6  
7  
8  
9  
10  
11  
12  
13  
14  
15  
16  
17  
18  
19  
20  
21  
22  
23  
24  
25  
26  
27  
28  
29  
30  
31  
32  
33  
34  
35  
36  
37  
38  
39  
40  
41  
42  
43  
44  
45  
46  
47  
48  
49  
50  
51  
52  
53  
54  
55  
56  
57  
58  
59  
60
24. Sullivan, C. E. (2021). Developing a Core Set of Nursing-Sensitive Indicators for International Pediatric Oncology Nursing Practice [Doctoral dissertation, University of Alabama at Birmingham]. ProQuest Dissertations Publishing.
  25. Association of Pediatric Hematology/Oncology Nurses. [www.aphon.org](http://www.aphon.org).
  26. Hollis R. The role of the specialist nurse in paediatric oncology in the United Kingdom. *Eur J Cancer*. 2005 Aug;41(12):1758-64. doi: 10.1016/j.ejca.2005.04.025.
  27. World Health Organization. (2018). Defining competent maternal and newborn health professionals: Background document to the 2018 joint statement by WHO, UNFPA, UNICEF, ICM, ICN, FIGO and IPA: definition of skilled health personnel providing care during childbirth. <https://apps.who.int/iris/handle/10665/272817>.
  28. PAHO. (2019). Diretriz estratégica para a enfermagem na região das américas. <https://iris.paho.org/handle/10665.2/50956?locale-attribute=pt>
  29. International Council of Nurse. (2014). Regulatory board governance toolkit [development by Jean Barry]. ICN. Geneva, Switzerland.
  30. Tricco AC, Lillie E, Zarin W, O'Brien KK, Colquhoun H, Levac D, et al. PRISMA Extension for Scoping Reviews (PRISMA-ScR): Checklist and Explanation. *Ann Intern Med*. 2018; 169(7):467–73. <https://doi.org/10.7326/M18-0850>.
  31. Peters MDJ, Godfrey C, McInerney P, Munn Z, Tricco AC, Khalil, H. Chapter 11: Scoping Reviews (2020 version). In: Aromataris E, Munn Z (Editors). *JBIM Manual for Evidence Synthesis*, JBI, 2020. <https://doi.org/10.46658/JBIMES-20-12>.
  32. Arksey H, O'Malley L. Scoping studies: Towards a Methodological Framework. *Int J Soc Res Methodol*. 2005;8:19–32.
  33. Tricco AC, Lillie E, Zarin W, O'Brien K, Colquhoun H, Kastner M, Levac D, Ng C, Sharpe JP, Wilson K, Kenny M, Warren R, Wilson C, Stelfox HT, Straus SE. A scoping review on the conduct and reporting of scoping reviews. *BMC Med Res Methodol*. 2016 Feb 9;16:15. doi: 10.1186/s12874-016-0116-4.
  34. Munn Z, Peters MDJ, Stern C, Tufanaru C, McArthur A, Aromataris E. Systematic review or scoping review? Guidance for authors when choosing between a systematic or scoping review approach. *BMC Med Res Methodol*. 2018 Nov 19;18(1):143. doi: 10.1186/s12874-018-0611-x.



- 1  
2  
3  
4  
5  
6  
7  
8  
9  
10  
11  
12  
13  
14  
15  
16  
17  
18  
19  
20  
21  
22  
23  
24  
25  
26  
27  
28  
29  
30  
31  
32  
33  
34  
35  
36  
37  
38  
39  
40  
41  
42  
43  
44  
45  
46  
47  
48  
49  
50  
51  
52  
53  
54  
55  
56  
57  
58  
59  
60
35. Lopes-Júnior LC, Bomfim EO, Nascimento LC, Nunes MD, Pereira-da-Silva G, Lima RA. Non-pharmacological interventions to manage fatigue and psychological stress in children and adolescents with cancer: an integrative review. *Eur J Cancer Care (Engl)*. 2016 Nov;25(6):921-935. <https://doi.org/10.1111/ecc.12381>.
  36. Lopes-Júnior LC, Lima RAG, Olson K, Bomfim E, Neves ET, Silveira DSCD, Nunes MDR, Nascimento LC, Pereira-da-Silva G. Systematic review protocol examining the effectiveness of hospital clowns for symptom cluster management in paediatrics. *BMJ Open*. 2019 Jan 21;9(1):e026524. doi: 10.1136/bmjopen-2018-026524.
  37. Lopes-Júnior LC, Siqueira PC, Maciel ELN. School reopening and risks accelerating the COVID-19 pandemic: A systematic review and meta-analysis protocol. *PLoS One*. 2021 Nov 17;16(11):e0260189. doi: 10.1371/journal.pone.0260189. PMID: 34788344.
  38. Ouzzani M, Hammady H, Fedorowicz Z, Elmagarmid A. Rayyan-a web and mobile app for systematic reviews. *Syst Rev*. 2016 Dec 5;5(1):210. doi: 10.1186/s13643-016-0384-4.
  39. Lopes-Júnior LC, Rosa MADRP, Lima RAG. Psychological and Psychiatric Outcomes Following PICU Admission: a systematic review of cohort studies. *Pediatr Crit Care Med*. 2018; 19(1):e58-e67. <https://doi.org/doi:10.1097/PCC.0000000000001390>
  40. Lopes-Júnior LC, Rosa GS, Pessanha RM, Schuab SIPC, Nunes KZ, Amorim MHC. Efficacy of the complementary therapies in the management of cancer pain in palliative care: a systematic review. *Rev Lat Am Enfermagem*. 2020; 28:e3377. <https://doi.org/10.1590/1518-8345.4213.3377>.
  41. Lopes-Júnior LC, Bomfim E, Olson K, Neves ET, Silveira DSC, Nunes MDR, et al. Effectiveness of hospital clowns for symptom management in paediatrics: systematic review of randomised and non-randomised controlled trials. *BMJ*. 2020 Dec 16;371:m4290. doi: <https://doi.org/10.1136/bmj.m4290>.
  42. Lopes-Júnior LC, Urbano IR, Schuab SIPC, Pessanha RM, Rosa GS, Lima RAG. Effectiveness of complementary therapies for the management of symptom clusters in palliative care in pediatric oncology: a systematic review. *Rev Esc Enferm USP*. 2021 May 19;55:03709.

- 1  
2  
3 43. Fineout-Overholt E, Melnyk BM, Stillwell SB, Williamson KM. Evidence-  
4 based practice step by step: Critical appraisal of the evidence: part I. Am J  
5 Nurs. 2010 Jul;110(7):47-52. doi: 10.1097/01.NAJ.0000383935.22721.9c.  
6  
7  
8 44. Page MJ, McKenzie JE, Bossuyt PM, Boutron I, Hoffmann TC, Mulrow CD,  
9 et al. The PRISMA 2020 statement: an updated guideline for reporting  
10 systematic reviews. BMJ. 2021 Mar 29;372:n71. doi: 10.1136/bmj.n71.  
11  
12  
13  
14  
15  
16  
17  
18  
19  
20  
21  
22  
23  
24  
25  
26  
27  
28  
29  
30  
31  
32  
33  
34  
35  
36  
37  
38  
39  
40  
41  
42  
43  
44  
45  
46  
47  
48  
49  
50  
51  
52  
53  
54  
55  
56  
57  
58  
59  
60

For peer review only

PRISMA 2020 flow diagram for new systematic reviews which included searches of databases, registers and other sources



Figure 1. PRISMA flowchart.

484x284mm (118 x 118 DPI)

**Chart 1.** Supplementary file of preliminary pilot search strategy in all databases.

| Databases        | Item searched                                                                                                                                                                                                                                                                                                                                                                                                                                                                                                                                                                                                                                                                                                                                                                                                                                                                                                                                                                                                                                                                                                                                                                                                                                                                                                                                                                                                                                                                                                                                                                                                                                                                                                                                                                                                                                                                                                                                                                                                                                                                                                                                                                                                                                                                                                                                                                                                                                                                                                                                                                                                                                                                                                                                                                                                                                                                                                |
|------------------|--------------------------------------------------------------------------------------------------------------------------------------------------------------------------------------------------------------------------------------------------------------------------------------------------------------------------------------------------------------------------------------------------------------------------------------------------------------------------------------------------------------------------------------------------------------------------------------------------------------------------------------------------------------------------------------------------------------------------------------------------------------------------------------------------------------------------------------------------------------------------------------------------------------------------------------------------------------------------------------------------------------------------------------------------------------------------------------------------------------------------------------------------------------------------------------------------------------------------------------------------------------------------------------------------------------------------------------------------------------------------------------------------------------------------------------------------------------------------------------------------------------------------------------------------------------------------------------------------------------------------------------------------------------------------------------------------------------------------------------------------------------------------------------------------------------------------------------------------------------------------------------------------------------------------------------------------------------------------------------------------------------------------------------------------------------------------------------------------------------------------------------------------------------------------------------------------------------------------------------------------------------------------------------------------------------------------------------------------------------------------------------------------------------------------------------------------------------------------------------------------------------------------------------------------------------------------------------------------------------------------------------------------------------------------------------------------------------------------------------------------------------------------------------------------------------------------------------------------------------------------------------------------------------|
| MEDLINE/PubMed   | <p><b>P- POPULATION:</b></p> <p><b>#1</b> ((Oncology Nursing [MeSH Terms] OR “Nursing, Oncology” [All Fields] OR “Oncologic Nursing” [All Fields] OR “Cancer Nursing” [All Fields] OR “Nursing, Cancer” [All Fields] OR “Oncological Nursing” [All Fields] OR “Oncology Certified Nurse” [All Fields]))</p> <p><b>#2</b> ((“Pediatric Nursing [MeSH Terms] OR “Nursing, Pediatric” [All Fields] OR “Pediatric Oncology Nurses” [All Fields] OR “Pediatric Oncology Nursing” [All Fields] OR “Pediatric Hematology/Oncology Nurses” [All Fields]))</p> <p><b>#3</b> #1 AND #2</p> <p><b>C- CONCEPT:</b></p> <p><b>#4</b> ((Clinical Competence [MeSH Terms] OR Competency, Clinical [All Fields] OR “Competence, Clinical” [All Fields] OR “Clinical Competency” [All Fields] OR “Clinical Competencies” [All Fields] OR “Competencies, Clinical” [All Fields] OR “Clinical Skills” [All Fields] OR “Skills, Clinical” [All Fields] OR “Professional Competence” [MeSH Terms] OR “Competence, Professional” [All Fields] OR “Generalization of Expertise” [All Fields] OR “Technical Expertise” [All Fields] OR “Expertise, Technical” [All Fields] OR “Competency-Based Education” [MeSH Terms] OR “Competency Based Education” [All Fields] OR “Education, Competency-Based” [All Fields] OR “Education, Competency Based” [All Fields]))</p> <p><b>C: CONTEXT</b></p> <p><b>#5</b> ((Curriculum [MeSH Terms] OR Curricula [All Fields] OR “Training Programs” [All Fields] OR “Program, Training” [All Fields] OR “Programs, Training” [All Fields] OR “Literacy Programs” [All Fields] OR “Literacy Program” [All Fields] OR “Program, Literacy” [All Fields] OR “Programs, Literacy” OR “Professional Education” [All Fields] OR “Education, Nursing” [MeSH Terms] OR “Nursing Education” [All Fields] OR “Education, Nursing, Continuing” [MeSH Terms] OR “Post-Registration Nursing Education” [All Fields] OR “Education, Post-Basic Nursing” [All Fields] OR “Post Basic Nursing Education” [All Fields] OR “Continuing Nursing Education” [All Fields] OR “Nursing Education Continuing” [All Fields] OR “Education, Nursing, Graduate” [MeSH Terms] OR “Nursing Education, Graduate” [All Fields] OR “Postgraduate Nursing Education” [All Fields] OR “Graduate Nursing Education” [All Fields] OR “Nursing Education Research” [MeSH Terms] OR “Nursing Research, Education” [All Fields] OR “Education Nursing Research” [All Fields] OR “Education Research, Nursing” [All Fields] OR “Research, Nursing Education” [All Fields] OR “Nursing Research” [MeSH Terms] OR “Research Nursing” [All Fields] OR “Advanced Practice Nursing” [MeSH Terms] OR “Nursing, Advanced Practice” [All Fields] OR “Practice Nursing, Advanced” [All Fields] OR “Nurse’s Role” [MeSH Terms] OR “Role, Nurses” [All Fields] OR “Nurse’s Scope of Practice” [All Fields]))</p> <p><b>#6</b> #3 AND (#4 OR #5)</p> |
| Cochrane Library | <p><b>#1</b> (Oncology Nursing) OR (Nursing, Oncology) OR (Oncologic Nursing) OR (Cancer Nursing) OR (Nursing, Cancer) OR (Oncological Nursing) OR (Oncology Certified Nurse)</p> <p><b>#2</b> (Pediatric Nursing) OR (Nursing, Pediatric) OR (Pediatric Oncology Nurse) OR (Pediatric Oncology Nursing) OR (Pediatric Hematology Oncology Nurses)</p> <p><b>#3</b> #1 AND #2</p> <p><b>#4</b> (Clinical Competence) OR (Competency, Clinical) OR (Competence, Clinical) OR (Clinical Competency) OR (Clinical Competencies) OR (Competencies, Clinical) OR (Clinical Skills) OR (Skills, Clinical) OR (Professional Competence) OR (Competence, Professional) OR (Generalization of Expertise) OR (Technical Expertise) OR (Expertise, Technical) OR (Competency-Based Education) OR (Competency Based Education) OR (Education, Competency-Based) OR (Education, Competency Based)</p>                                                                                                                                                                                                                                                                                                                                                                                                                                                                                                                                                                                                                                                                                                                                                                                                                                                                                                                                                                                                                                                                                                                                                                                                                                                                                                                                                                                                                                                                                                                                                                                                                                                                                                                                                                                                                                                                                                                                                                                                                     |

|                |                                                                                                                                                                                                                                                                                                                                                                                                                                                                                                                                                                                                                                                                                                                                                                                                                                                                                                                                                                                                                                                                                                          |
|----------------|----------------------------------------------------------------------------------------------------------------------------------------------------------------------------------------------------------------------------------------------------------------------------------------------------------------------------------------------------------------------------------------------------------------------------------------------------------------------------------------------------------------------------------------------------------------------------------------------------------------------------------------------------------------------------------------------------------------------------------------------------------------------------------------------------------------------------------------------------------------------------------------------------------------------------------------------------------------------------------------------------------------------------------------------------------------------------------------------------------|
|                | <p><b>#5</b> (Curriculum) OR (Curricula) OR (Training Programs) OR (Program, Training) OR (Programs, Training) OR (Literacy Programs) OR (Literacy Program) OR (Program, Literacy) OR (Programs, Literacy) OR (Professional Education) OR (Education, Nursing) OR (Nursing Education) OR (Education, Nursing, Continuing) OR (Post-Registration Nursing Education) OR (Post-Basic Nursing Education) OR (Education, Post-Basic Nursing) OR (Post Basic Nursing Education) OR (Continuing Nursing Education) OR (Nursing Education Continuing) OR (Education, Nursing, Graduate) OR (Nursing Education, Graduate) OR (Postgraduate Nursing Education) OR (Graduate Nursing Education) OR (Nursing Education Research) OR (Nursing Research, Education) OR (Education Nursing Research) OR (Education Research, Nursing) OR (Research, Nursing Education) OR (Nursing Research) OR (Research Nursing) OR (Advanced Practice Nursing) OR (Nursing, Advanced Practice) OR (Practice Nursing, Advanced) OR (Nurse's Role OR Role, Nurses OR Nurse's Scope of Practice)</p> <p><b>#6</b> #3 AND (#4 OR #5)</p> |
| Embase         | <p><b>#1</b> ('oncology nursing'/exp OR oncologic nursing OR cancer nursing)</p> <p><b>#2</b> ('pediatric oncology nursing'/exp OR pediatric nursing)</p> <p><b>#3</b> ('competence'/exp OR 'clinical competence'/exp OR cultural competence OR 'legal competence'/exp)</p> <p><b>#4</b> ('nursing competence'/exp OR nursing skill OR 'professional competence'/exp)</p> <p><b>#5</b> #1 AND #2 AND #3 AND #4</p>                                                                                                                                                                                                                                                                                                                                                                                                                                                                                                                                                                                                                                                                                       |
| Web of Science | <p><b>#1</b> ALL=((Oncology Nursing) OR (Nursing, Oncology) OR (Oncologic Nursing) OR (Cancer Nursing) OR (Nursing, Cancer) OR (Oncological Nursing) OR (Oncology Certified Nurse))</p> <p><b>#2</b> ALL=((Pediatric Nursing) OR (Nursing, Pediatric) OR (Pediatric Oncology Nurse) OR (Pediatric Oncology Nursing) OR (Pediatric Hematology Oncology Nurses))</p> <p><b>#3</b> ALL=((Clinical Competence) OR (Competency, Clinical) OR (Competence, Clinical) OR (Clinical Competency) OR (Clinical Competencies) OR (Competencies, Clinical) OR (Clinical Skills) OR (Skills, Clinical) OR (Professional Competence) OR (Competence, Professional) OR (Competency-Based Education) OR (Competency Based Education) OR (Education, Competency-Based) OR (Education, Competency Based))</p>                                                                                                                                                                                                                                                                                                              |
| Scopus         | <p><b>#1</b> TITLE-ABS-KEY((Oncology Nursing OR Nursing, Oncology OR Oncologic Nursing OR Cancer Nursing OR Nursing, Cancer OR Oncological Nursing OR Oncology Certified Nurse))</p> <p><b>#2</b> TITLE-ABS-KEY((Pediatric Nursing OR Nursing, Pediatric OR Pediatric Oncology Nurse OR Pediatric Oncology Nursing OR Pediatric Hematology Oncology Nurses))</p> <p><b>#3</b> #1 AND #2</p> <p><b>#4</b> TITLE-ABS-KEY((Clinical Competence OR Competency, Clinical OR Competence, Clinical OR Clinical Competency OR Clinical Competencies OR Competencies, Clinical OR Clinical Skills OR Skills, Clinical OR Professional Competence OR Competence, Professional OR Competency-Based Education OR Competency Based Education OR Education, Competency-Based OR Education, Competency Based))</p> <p><b>#5</b> #3 AND #4</p>                                                                                                                                                                                                                                                                           |

|                                                       |                                                                                                                                                                                                                                                                                                                                                                                                                                                                                                                                                                                                                                                                                                                                                                                                                                                                                                                                                                                                                                                                              |
|-------------------------------------------------------|------------------------------------------------------------------------------------------------------------------------------------------------------------------------------------------------------------------------------------------------------------------------------------------------------------------------------------------------------------------------------------------------------------------------------------------------------------------------------------------------------------------------------------------------------------------------------------------------------------------------------------------------------------------------------------------------------------------------------------------------------------------------------------------------------------------------------------------------------------------------------------------------------------------------------------------------------------------------------------------------------------------------------------------------------------------------------|
| Science Direct                                        | <p>#1 (Oncology Nursing OR Cancer Nursing OR Oncology Certified Nurse)</p> <p>#2 (Pediatric Nursing OR Pediatric Oncology Nurse)</p> <p>#3 (Clinical Competencies OR Clinical Skills OR Professional Competence OR Competency-Based Education)</p> <p>#4 #1 AND #2 AND #3</p>                                                                                                                                                                                                                                                                                                                                                                                                                                                                                                                                                                                                                                                                                                                                                                                                |
| CINAHL                                                | <p>#1 (Oncologic Nursing [Cinahl headings] OR Oncology Nursing [Kw] OR Cancer Nursing [Kw] OR Pediatric Oncology Nursing [Cinahl headings] OR Radiation Oncology Nursing [Cinahl headings] OR Oncology Nursing Society [Cinahl headings] OR Association of Pediatric Oncology Nursing [Cinahl headings] OR Canadian Association of Nurses in Oncology [Cinahl headings])</p> <p>#2 (Competence (Legal) [Cinahl headings] OR Clinical Competence [Cinahl headings] OR Cultural Competence [Cinahl headings] OR Competence Assessment [Cinahl headings] OR Competence [Kw] OR Professional Competence [Cinahl headings] OR Education, Competency-Based [Cinahl headings] OR Information Literacy [Cinahl headings] OR Communication Skills [Cinahl headings])</p>                                                                                                                                                                                                                                                                                                              |
| LILACS                                                | <p>#1 ((Enfermagem Oncológica [DeCS] OR Oncology Nursing [DeCS] OR Enfermería Oncológica [DeCS] OR Soins infirmiers en oncologie [DeCS]) AND (Enfermeiras Pediátricas [DeCS] OR Nurses, Pediatric [DeCS] OR Enfermeras Pediátricas [DeCS] OR Infirmiers pédiatriques [DeCS] OR Profissionais de Enfermagem Pediátrica [DeCS] OR Pediatric Nurse Practitioners [DeCS] OR Profesionales de Enfermería Pediátrica [DeCS] OR Infirmières praticiennes pédiatriques [DeCS]))</p> <p>#2 ((Competência Clínica [DeCS] OR Clinical Competence [DeCS] OR Competencia Clínica [DeCS] OR Compétence clinique [DeCS] OR Competência Cultural [DeCS] OR Cultural Competency [DeCS] OR Competencia Cultural [DeCS] OR Compétence culturelle [DeCS] OR Competência Profissional [DeCS] OR Professional Competence [DeCS] OR Competencia Profesional [DeCS] OR Compétence professionnelle [DeCS] OR Educação Baseada em Competências [DeCS] OR Competency-Based Education [DeCS] OR Educación Basada en Competencias [DeCS] OR Modèle de compétence attendue [DeCS])</p> <p>#3 #1 AND #2</p> |
| <b>Registers</b>                                      | <b>Item searched</b>                                                                                                                                                                                                                                                                                                                                                                                                                                                                                                                                                                                                                                                                                                                                                                                                                                                                                                                                                                                                                                                         |
| ClinicalTrial.gov                                     | (Pediatric Oncology Nurse OR Pediatric Oncology Nursing) AND (Professional Competence OR Competency-Based Education)                                                                                                                                                                                                                                                                                                                                                                                                                                                                                                                                                                                                                                                                                                                                                                                                                                                                                                                                                         |
| WHO International Clinical Trials Registry Platform   | (Pediatric Oncology Nurse OR Pediatric Oncology Nursing) AND (Professional Competence OR Competency-Based Education)                                                                                                                                                                                                                                                                                                                                                                                                                                                                                                                                                                                                                                                                                                                                                                                                                                                                                                                                                         |
| <b>Organizations and Websites and grey literature</b> | <b>Item searched</b>                                                                                                                                                                                                                                                                                                                                                                                                                                                                                                                                                                                                                                                                                                                                                                                                                                                                                                                                                                                                                                                         |
| The British Library (UK)                              | <p>#1 (Oncology Nursing OR Nursing, Oncology OR Oncologic Nursing OR Cancer Nursing OR Nursing, Cancer OR Oncological Nursing OR Oncology Certified Nurse)</p> <p>#2 (Pediatric Nursing OR Nursing, Pediatric OR Pediatric Oncology Nurse OR Pediatric Oncology Nursing OR Pediatric Hematology Oncology Nurses)</p>                                                                                                                                                                                                                                                                                                                                                                                                                                                                                                                                                                                                                                                                                                                                                         |

|                                                 |                                                                                                                                                                                                                                                                                                                                                                            |
|-------------------------------------------------|----------------------------------------------------------------------------------------------------------------------------------------------------------------------------------------------------------------------------------------------------------------------------------------------------------------------------------------------------------------------------|
|                                                 | #3 (Clinical Competence OR Competency, Clinical OR Competence, Clinical OR Clinical Competency OR Clinical Competencies OR Competencies, Clinical OR Clinical Skills OR Skills, Clinical OR Professional Competence OR Competence, Professional OR Competency-Based Education OR Competency Based Education OR Education, Competency-Based OR Education, Competency Based) |
| Google Scholar                                  | ("Pediatric Oncology Nurse" OR "Pediatric Oncology Nursing") AND ("Clinical Competencies" OR "Professional Competence" OR "Competency-Based Education")                                                                                                                                                                                                                    |
| The ProQuest<br>Dissertation & Theses<br>Global | ("Pediatric Oncology Nurse" OR "Pediatric Oncology Nursing") AND ("Professional Competence" OR "Competency-Based Education")                                                                                                                                                                                                                                               |
| Preprints for Health<br>Sciences [medRxiv]      | ("Pediatric Oncology Nurse" OR "Pediatric Oncology Nursing") AND ("Professional Competence" OR "Competency-Based Education")                                                                                                                                                                                                                                               |

## PRISMA-P 2015 Checklist

This checklist has been adapted for use with protocol submissions to *Systematic Reviews* from Table 3 in Moher D et al: Preferred reporting items for systematic review and meta-analysis protocols (PRISMA-P) 2015 statement. *Systematic Reviews* 2015 4:1

| Section/topic                     | #  | Checklist item                                                                                                                                                                                  | Information reported                |                                     | Page number(s) |
|-----------------------------------|----|-------------------------------------------------------------------------------------------------------------------------------------------------------------------------------------------------|-------------------------------------|-------------------------------------|----------------|
|                                   |    |                                                                                                                                                                                                 | Yes                                 | No                                  |                |
| <b>ADMINISTRATIVE INFORMATION</b> |    |                                                                                                                                                                                                 |                                     |                                     |                |
| <b>Title</b>                      |    |                                                                                                                                                                                                 |                                     |                                     |                |
| Identification                    | 1a | Identify the report as a protocol of a systematic review                                                                                                                                        | <input checked="" type="checkbox"/> | <input type="checkbox"/>            | 1              |
| Update                            | 1b | If the protocol is for an update of a previous systematic review, identify as such                                                                                                              | <input type="checkbox"/>            | <input checked="" type="checkbox"/> | -              |
| <b>Registration</b>               | 2  | If registered, provide the name of the registry (e.g., PROSPERO) and registration number in the Abstract                                                                                        | <input checked="" type="checkbox"/> | <input type="checkbox"/>            | 2              |
| <b>Authors</b>                    |    |                                                                                                                                                                                                 |                                     |                                     |                |
| Contact                           | 3a | Provide name, institutional affiliation, and e-mail address of all protocol authors; provide physical mailing address of corresponding author                                                   | <input checked="" type="checkbox"/> | <input type="checkbox"/>            | Title Page     |
| Contributions                     | 3b | Describe contributions of protocol authors and identify the guarantor of the review                                                                                                             | <input checked="" type="checkbox"/> | <input type="checkbox"/>            | Title Page     |
| <b>Amendments</b>                 | 4  | If the protocol represents an amendment of a previously completed or published protocol, identify as such and list changes; otherwise, state plan for documenting important protocol amendments | <input checked="" type="checkbox"/> | <input type="checkbox"/>            | Title Page     |
| <b>Support</b>                    |    |                                                                                                                                                                                                 |                                     |                                     |                |
| Sources                           | 5a | Indicate sources of financial or other support for the review                                                                                                                                   | <input checked="" type="checkbox"/> | <input type="checkbox"/>            | Title Page     |
| Sponsor                           | 5b | Provide name for the review funder and/or sponsor                                                                                                                                               | <input checked="" type="checkbox"/> | <input type="checkbox"/>            | Title Page     |
| Role of sponsor/funder            | 5c | Describe roles of funder(s), sponsor(s), and/or institution(s), if any, in developing the protocol                                                                                              | <input checked="" type="checkbox"/> | <input type="checkbox"/>            | Title Page     |
| <b>INTRODUCTION</b>               |    |                                                                                                                                                                                                 |                                     |                                     |                |
| <b>Rationale</b>                  | 6  | Describe the rationale for the review in the context of what is already known                                                                                                                   | <input checked="" type="checkbox"/> | <input type="checkbox"/>            | 3              |
| <b>Objectives</b>                 | 7  | Provide an explicit statement of the question(s) the review will address with reference to participants, interventions, comparators, and outcomes (PICO)                                        | <input checked="" type="checkbox"/> | <input type="checkbox"/>            | 4              |
| <b>METHODS</b>                    |    |                                                                                                                                                                                                 |                                     |                                     |                |
| <b>Eligibility criteria</b>       | 8  | Specify the study characteristics (e.g., PICO, study design, setting, time frame) and report characteristics (e.g., years considered, language, publication status) to be used as criteria for  | <input checked="" type="checkbox"/> | <input type="checkbox"/>            | 4-6            |



| Section/topic                             | #   | Checklist item                                                                                                                                                                                                                              | Information reported                |                                     | Page number(s) |
|-------------------------------------------|-----|---------------------------------------------------------------------------------------------------------------------------------------------------------------------------------------------------------------------------------------------|-------------------------------------|-------------------------------------|----------------|
|                                           |     |                                                                                                                                                                                                                                             | Yes                                 | No                                  |                |
|                                           |     | eligibility for the review                                                                                                                                                                                                                  |                                     |                                     |                |
| <b>Information sources</b>                | 9   | Describe all intended information sources (e.g., electronic databases, contact with study authors, trial registers, or other grey literature sources) with planned dates of coverage                                                        | <input checked="" type="checkbox"/> | <input type="checkbox"/>            | 5              |
| <b>Search strategy</b>                    | 10  | Present draft of search strategy to be used for at least one electronic database, including planned limits, such that it could be repeated                                                                                                  | <input checked="" type="checkbox"/> | <input type="checkbox"/>            | 5-6            |
| <b>STUDY RECORDS</b>                      |     |                                                                                                                                                                                                                                             |                                     |                                     |                |
| Data management                           | 11a | Describe the mechanism(s) that will be used to manage records and data throughout the review                                                                                                                                                | <input checked="" type="checkbox"/> | <input type="checkbox"/>            | 7              |
| Selection process                         | 11b | State the process that will be used for selecting studies (e.g., two independent reviewers) through each phase of the review (i.e., screening, eligibility, and inclusion in meta-analysis)                                                 | <input checked="" type="checkbox"/> | <input type="checkbox"/>            | 6-7            |
| Data collection process                   | 11c | Describe planned method of extracting data from reports (e.g., piloting forms, done independently, in duplicate), any processes for obtaining and confirming data from investigators                                                        | <input checked="" type="checkbox"/> | <input type="checkbox"/>            | 7              |
| <b>Data items</b>                         | 12  | List and define all variables for which data will be sought (e.g., PICO items, funding sources), any pre-planned data assumptions and simplifications                                                                                       | <input checked="" type="checkbox"/> | <input type="checkbox"/>            | 7              |
| <b>Outcomes and prioritization</b>        | 13  | List and define all outcomes for which data will be sought, including prioritization of main and additional outcomes, with rationale                                                                                                        | <input checked="" type="checkbox"/> | <input type="checkbox"/>            | 7              |
| <b>Risk of bias in individual studies</b> | 14  | Describe anticipated methods for assessing risk of bias of individual studies, including whether this will be done at the outcome or study level, or both; state how this information will be used in data synthesis                        | <input type="checkbox"/>            | <input checked="" type="checkbox"/> | -              |
| <b>DATA</b>                               |     |                                                                                                                                                                                                                                             |                                     |                                     |                |
| <b>Synthesis</b>                          | 15a | Describe criteria under which study data will be quantitatively synthesized                                                                                                                                                                 | <input checked="" type="checkbox"/> | <input type="checkbox"/>            | 8              |
|                                           | 15b | If data are appropriate for quantitative synthesis, describe planned summary measures, methods of handling data, and methods of combining data from studies, including any planned exploration of consistency (e.g., $I^2$ , Kendall's tau) | <input type="checkbox"/>            | <input checked="" type="checkbox"/> | -              |
|                                           | 15c | Describe any proposed additional analyses (e.g., sensitivity or subgroup analyses, meta-regression)                                                                                                                                         | <input type="checkbox"/>            | <input checked="" type="checkbox"/> | -              |
|                                           | 15d | If quantitative synthesis is not appropriate, describe the type of summary planned                                                                                                                                                          | <input type="checkbox"/>            | <input checked="" type="checkbox"/> | -              |
| <b>Meta-bias(es)</b>                      | 16  | Specify any planned assessment of meta-bias(es) (e.g., publication bias across studies, selective reporting within studies)                                                                                                                 | <input type="checkbox"/>            | <input checked="" type="checkbox"/> | -              |
| <b>Confidence in cumulative evidence</b>  | 17  | Describe how the strength of the body of evidence will be assessed (e.g., GRADE)                                                                                                                                                            | <input type="checkbox"/>            | <input checked="" type="checkbox"/> | -              |
