# Supplementary material for: Essential core competencies for scope of practice of paediatric oncology nurses in Latin America: a scoping review protocol
Source: PubMed Central journal article supplement — BMJ Open. 2022 Jul 22;12(7):e061853. doi: 10.1136/bmjopen-2022-061853 (PMC9316046; doi:10.1136/bmjopen-2022-061853), 2022-07-22
Supplement: bmjopen-2022-061853supp001.pdf [file bmjopen-2022-061853supp001.pdf]

**Chart 1.** Supplementary file of preliminary pilot search strategy in all databases.

| Databases        | Item searched                                                                                                                                                                                                                                                                                                                                                                                                                                                                                                                                                                                                                                                                                                                                                                                                                                                                                                                                                                                                                                                                                                                                                                                                                                                                                                                                                                                                                                                                                                                                                                                                                                                                                                                                                                                                                                                                                                                                                                                                                                                                                                                                                                                                                                                                                                                                                                                                                                                                                                                                                                                                                                                                                                                                                                                                                                                                                                                                               |
|------------------|-------------------------------------------------------------------------------------------------------------------------------------------------------------------------------------------------------------------------------------------------------------------------------------------------------------------------------------------------------------------------------------------------------------------------------------------------------------------------------------------------------------------------------------------------------------------------------------------------------------------------------------------------------------------------------------------------------------------------------------------------------------------------------------------------------------------------------------------------------------------------------------------------------------------------------------------------------------------------------------------------------------------------------------------------------------------------------------------------------------------------------------------------------------------------------------------------------------------------------------------------------------------------------------------------------------------------------------------------------------------------------------------------------------------------------------------------------------------------------------------------------------------------------------------------------------------------------------------------------------------------------------------------------------------------------------------------------------------------------------------------------------------------------------------------------------------------------------------------------------------------------------------------------------------------------------------------------------------------------------------------------------------------------------------------------------------------------------------------------------------------------------------------------------------------------------------------------------------------------------------------------------------------------------------------------------------------------------------------------------------------------------------------------------------------------------------------------------------------------------------------------------------------------------------------------------------------------------------------------------------------------------------------------------------------------------------------------------------------------------------------------------------------------------------------------------------------------------------------------------------------------------------------------------------------------------------------------------|
| MEDLINE/PubMed   | <p><b>P- POPULATION:</b></p> <p><b>#1</b> ((Oncology Nursing [MeSH Terms] OR “Nursing, Oncology” [All Fields] OR “Oncologic Nursing” [All Fields] OR “Cancer Nursing” [All Fields] OR “Nursing, Cancer” [All Fields] OR “Oncological Nursing” [All Fields] OR “Oncology Certified Nurse” [All Fields]))</p> <p><b>#2</b> ((“Pediatric Nursing [MeSH Terms] OR “Nursing, Pediatric” [All Fields] OR “Pediatric Oncology Nurses” [All Fields] OR “Pediatric Oncology Nursing” [All Fields] OR “Pediatric Hematology/Oncology Nurses” [All Fields]))</p> <p><b>#3</b> #1 AND #2</p> <p><b>C- CONCEPT:</b></p> <p><b>#4</b> ((Clinical Competence [MeSH Terms] OR Competency, Clinical [All Fields] OR “Competence, Clinical” [All Fields] OR “Clinical Competency” [All Fields] OR “Clinical Competencies” [All Fields] OR “Competencies, Clinical” [All Fields] OR “Clinical Skills” [All Fields] OR “Skills, Clinical” [All Fields] OR “Professional Competence” [MeSH Terms] OR “Competence, Professional” [All Fields] OR “Generalization of Expertise” [All Fields] OR “Technical Expertise” [All Fields] OR “Expertise, Technical” [All Fields] OR “Competency-Based Education” [MeSH Terms] OR “Competency Based Education” [All Fields] OR “Education, Competency-Based” [All Fields] OR “Education, Competency Based” [All Fields]))</p> <p><b>C: CONTEXT</b></p> <p><b>#5</b> ((Curriculum [MeSH Terms] OR Curricula [All Fields] OR “Training Programs” [All Fields] OR “Program, Training” [All Fields] OR “Programs, Training” [All Fields] OR “Literacy Programs” [All Fields] OR “Literacy Program” [All Fields] OR “Program, Literacy” [All Fields] OR “Programs, Literacy” OR “Professional Education” [All Fields] OR “Education, Nursing” [MeSH Terms] OR “Nursing Education” [All Fields] OR “Education, Nursing, Continuing” [MeSH Terms] OR “Post-Registration Nursing Education” [All Fields] OR “Post-Basic Nursing Education” [All Fields] OR “Education, Post-Basic Nursing” [All Fields] OR “Post Basic Nursing Education” [All Fields] OR “Continuing Nursing Education” [All Fields] OR “Nursing Education Continuing” [All Fields] OR “Education, Nursing, Graduate” [MeSH Terms] OR “Nursing Education, Graduate” [All Fields] OR “Postgraduate Nursing Education” [All Fields] OR “Graduate Nursing Education” [All Fields] OR “Nursing Education Research” [MeSH Terms] OR “Nursing Research, Education” [All Fields] OR “Education Nursing Research” [All Fields] OR “Education Research, Nursing” [All Fields] OR “Research, Nursing Education” [All Fields] OR “Nursing Research” [MeSH Terms] OR “Research Nursing” [All Fields] OR “Advanced Practice Nursing” [MeSH Terms] OR “Nursing, Advanced Practice” [All Fields] OR “Practice Nursing, Advanced” [All Fields] OR “Nurse’s Role” [MeSH Terms] OR “Role, Nurses” [All Fields] OR “Nurse’s Scope of Practice” [All Fields]))</p> <p><b>#6</b> #3 AND (#4 OR #5)</p> |
| Cochrane Library | <p><b>#1</b> (Oncology Nursing) OR (Nursing, Oncology) OR (Oncologic Nursing) OR (Cancer Nursing) OR (Nursing, Cancer) OR (Oncological Nursing) OR (Oncology Certified Nurse)</p> <p><b>#2</b> (Pediatric Nursing) OR (Nursing, Pediatric) OR (Pediatric Oncology Nurse) OR (Pediatric Oncology Nursing) OR (Pediatric Hematology Oncology Nurses)</p> <p><b>#3</b> #1 AND #2</p> <p><b>#4</b> (Clinical Competence) OR (Competency, Clinical) OR (Competence, Clinical) OR (Clinical Competency) OR (Clinical Competencies) OR (Competencies, Clinical) OR (Clinical Skills) OR (Skills, Clinical) OR (Professional Competence) OR (Competence, Professional) OR (Generalization of Expertise) OR (Technical Expertise) OR (Expertise, Technical) OR (Competency-Based Education) OR (Competency Based Education) OR (Education, Competency-Based) OR (Education, Competency Based)</p>                                                                                                                                                                                                                                                                                                                                                                                                                                                                                                                                                                                                                                                                                                                                                                                                                                                                                                                                                                                                                                                                                                                                                                                                                                                                                                                                                                                                                                                                                                                                                                                                                                                                                                                                                                                                                                                                                                                                                                                                                                                                    |

|                |                                                                                                                                                                                                                                                                                                                                                                                                                                                                                                                                                                                                                                                                                                                                                                                                                                                                                                                                                                                                                                                                                                          |
|----------------|----------------------------------------------------------------------------------------------------------------------------------------------------------------------------------------------------------------------------------------------------------------------------------------------------------------------------------------------------------------------------------------------------------------------------------------------------------------------------------------------------------------------------------------------------------------------------------------------------------------------------------------------------------------------------------------------------------------------------------------------------------------------------------------------------------------------------------------------------------------------------------------------------------------------------------------------------------------------------------------------------------------------------------------------------------------------------------------------------------|
|                | <p><b>#5</b> (Curriculum) OR (Curricula) OR (Training Programs) OR (Program, Training) OR (Programs, Training) OR (Literacy Programs) OR (Literacy Program) OR (Program, Literacy) OR (Programs, Literacy) OR (Professional Education) OR (Education, Nursing) OR (Nursing Education) OR (Education, Nursing, Continuing) OR (Post-Registration Nursing Education) OR (Post-Basic Nursing Education) OR (Education, Post-Basic Nursing) OR (Post Basic Nursing Education) OR (Continuing Nursing Education) OR (Nursing Education Continuing) OR (Education, Nursing, Graduate) OR (Nursing Education, Graduate) OR (Postgraduate Nursing Education) OR (Graduate Nursing Education) OR (Nursing Education Research) OR (Nursing Research, Education) OR (Education Nursing Research) OR (Education Research, Nursing) OR (Research, Nursing Education) OR (Nursing Research) OR (Research Nursing) OR (Advanced Practice Nursing) OR (Nursing, Advanced Practice) OR (Practice Nursing, Advanced) OR (Nurse's Role OR Role, Nurses OR Nurse's Scope of Practice)</p> <p><b>#6</b> #3 AND (#4 OR #5)</p> |
| Embase         | <p><b>#1</b> ('oncology nursing'/exp OR oncologic nursing OR cancer nursing)</p> <p><b>#2</b> ('pediatric oncology nursing'/exp OR pediatric nursing)</p> <p><b>#3</b> ('competence'/exp OR 'clinical competence'/exp OR cultural competence OR 'legal competence'/exp)</p> <p><b>#4</b> ('nursing competence'/exp OR nursing skill OR 'professional competence'/exp)</p> <p><b>#5</b> #1 AND #2 AND #3 AND #4</p>                                                                                                                                                                                                                                                                                                                                                                                                                                                                                                                                                                                                                                                                                       |
| Web of Science | <p><b>#1</b> ALL=((Oncology Nursing) OR (Nursing, Oncology) OR (Oncologic Nursing) OR (Cancer Nursing) OR (Nursing, Cancer) OR (Oncological Nursing) OR (Oncology Certified Nurse))</p> <p><b>#2</b> ALL=((Pediatric Nursing) OR (Nursing, Pediatric) OR (Pediatric Oncology Nurse) OR (Pediatric Oncology Nursing) OR (Pediatric Hematology Oncology Nurses))</p> <p><b>#3</b> ALL=((Clinical Competence) OR (Competency, Clinical) OR (Competence, Clinical) OR (Clinical Competency) OR (Clinical Competencies) OR (Competencies, Clinical) OR (Clinical Skills) OR (Skills, Clinical) OR (Professional Competence) OR (Competence, Professional) OR (Competency-Based Education) OR (Competency Based Education) OR (Education, Competency-Based) OR (Education, Competency Based))</p>                                                                                                                                                                                                                                                                                                              |
| Scopus         | <p><b>#1</b> TITLE-ABS-KEY((Oncology Nursing OR Nursing, Oncology OR Oncologic Nursing OR Cancer Nursing OR Nursing, Cancer OR Oncological Nursing OR Oncology Certified Nurse))</p> <p><b>#2</b> TITLE-ABS-KEY((Pediatric Nursing OR Nursing, Pediatric OR Pediatric Oncology Nurse OR Pediatric Oncology Nursing OR Pediatric Hematology Oncology Nurses))</p> <p><b>#3</b> #1 AND #2</p> <p><b>#4</b> TITLE-ABS-KEY((Clinical Competence OR Competency, Clinical OR Competence, Clinical OR Clinical Competency OR Clinical Competencies OR Competencies, Clinical OR Clinical Skills OR Skills, Clinical OR Professional Competence OR Competence, Professional OR Competency-Based Education OR Competency Based Education OR Education, Competency-Based OR Education, Competency Based))</p> <p><b>#5</b> #3 AND #4</p>                                                                                                                                                                                                                                                                           |

|                                                       |                                                                                                                                                                                                                                                                                                                                                                                                                                                                                                                                                                                                                                                                                                                                                                                                                                                                                                                                                                                                                                                                              |
|-------------------------------------------------------|------------------------------------------------------------------------------------------------------------------------------------------------------------------------------------------------------------------------------------------------------------------------------------------------------------------------------------------------------------------------------------------------------------------------------------------------------------------------------------------------------------------------------------------------------------------------------------------------------------------------------------------------------------------------------------------------------------------------------------------------------------------------------------------------------------------------------------------------------------------------------------------------------------------------------------------------------------------------------------------------------------------------------------------------------------------------------|
| Science Direct                                        | <p>#1 (Oncology Nursing OR Cancer Nursing OR Oncology Certified Nurse)</p> <p>#2 (Pediatric Nursing OR Pediatric Oncology Nurse)</p> <p>#3 (Clinical Competencies OR Clinical Skills OR Professional Competence OR Competency-Based Education)</p> <p>#4 #1 AND #2 AND #3</p>                                                                                                                                                                                                                                                                                                                                                                                                                                                                                                                                                                                                                                                                                                                                                                                                |
| CINAHL                                                | <p>#1 (Oncologic Nursing [Cinahl headings] OR Oncology Nursing [Kw] OR Cancer Nursing [Kw] OR Pediatric Oncology Nursing [Cinahl headings] OR Radiation Oncology Nursing [Cinahl headings] OR Oncology Nursing Society [Cinahl headings] OR Association of Pediatric Oncology Nursing [Cinahl headings] OR Canadian Association of Nurses in Oncology [Cinahl headings])</p> <p>#2 (Competence (Legal) [Cinahl headings] OR Clinical Competence [Cinahl headings] OR Cultural Competence [Cinahl headings] OR Competence Assessment [Cinahl headings] OR Competence [Kw] OR Professional Competence [Cinahl headings] OR Education, Competency-Based [Cinahl headings] OR Information Literacy [Cinahl headings] OR Communication Skills [Cinahl headings]))</p>                                                                                                                                                                                                                                                                                                             |
| LILACS                                                | <p>#1 ((Enfermagem Oncológica [DeCS] OR Oncology Nursing [DeCS] OR Enfermería Oncológica [DeCS] OR Soins infirmiers en oncologie [DeCS]) AND (Enfermeiras Pediátricas [DeCS] OR Nurses, Pediatric [DeCS] OR Enfermeras Pediátricas [DeCS] OR Infirmiers pédiatriques [DeCS] OR Profissionais de Enfermagem Pediátrica [DeCS] OR Pediatric Nurse Practitioners [DeCS] OR Profesionales de Enfermería Pediátrica [DeCS] OR Infirmières praticiennes pédiatriques [DeCS]))</p> <p>#2 ((Competência Clínica [DeCS] OR Clinical Competence [DeCS] OR Competencia Clínica [DeCS] OR Compétence clinique [DeCS] OR Competência Cultural [DeCS] OR Cultural Competency [DeCS] OR Competencia Cultural [DeCS] OR Compétence culturelle [DeCS] OR Competência Profissional [DeCS] OR Professional Competence [DeCS] OR Competencia Profesional [DeCS] OR Compétence professionnelle [DeCS] OR Educação Baseada em Competências [DeCS] OR Competency-Based Education [DeCS] OR Educación Basada en Competencias [DeCS] OR Modèle de compétence attendue [DeCS])</p> <p>#3 #1 AND #2</p> |
| <b>Registers</b>                                      | <b>Item searched</b>                                                                                                                                                                                                                                                                                                                                                                                                                                                                                                                                                                                                                                                                                                                                                                                                                                                                                                                                                                                                                                                         |
| ClinicalTrial.gov                                     | (Pediatric Oncology Nurse OR Pediatric Oncology Nursing) AND (Professional Competence OR Competency-Based Education)                                                                                                                                                                                                                                                                                                                                                                                                                                                                                                                                                                                                                                                                                                                                                                                                                                                                                                                                                         |
| WHO International Clinical Trials Registry Platform   | (Pediatric Oncology Nurse OR Pediatric Oncology Nursing) AND (Professional Competence OR Competency-Based Education)                                                                                                                                                                                                                                                                                                                                                                                                                                                                                                                                                                                                                                                                                                                                                                                                                                                                                                                                                         |
| <b>Organizations and Websites and grey literature</b> | <b>Item searched</b>                                                                                                                                                                                                                                                                                                                                                                                                                                                                                                                                                                                                                                                                                                                                                                                                                                                                                                                                                                                                                                                         |
| The British Library (UK)                              | <p>#1 (Oncology Nursing OR Nursing, Oncology OR Oncologic Nursing OR Cancer Nursing OR Nursing, Cancer OR Oncological Nursing OR Oncology Certified Nurse)</p> <p>#2 (Pediatric Nursing OR Nursing, Pediatric OR Pediatric Oncology Nurse OR Pediatric Oncology Nursing OR Pediatric Hematology Oncology Nurses)</p>                                                                                                                                                                                                                                                                                                                                                                                                                                                                                                                                                                                                                                                                                                                                                         |

|                                           |                                                                                                                                                                                                                                                                                                                                                                            |
|-------------------------------------------|----------------------------------------------------------------------------------------------------------------------------------------------------------------------------------------------------------------------------------------------------------------------------------------------------------------------------------------------------------------------------|
|                                           | #3 (Clinical Competence OR Competency, Clinical OR Competence, Clinical OR Clinical Competency OR Clinical Competencies OR Competencies, Clinical OR Clinical Skills OR Skills, Clinical OR Professional Competence OR Competence, Professional OR Competency-Based Education OR Competency Based Education OR Education, Competency-Based OR Education, Competency Based) |
| Google Scholar                            | ("Pediatric Oncology Nurse" OR "Pediatric Oncology Nursing") AND ("Clinical Competencies" OR "Professional Competence" OR "Competency-Based Education")                                                                                                                                                                                                                    |
| The ProQuest Dissertation & Theses Global | ("Pediatric Oncology Nurse" OR "Pediatric Oncology Nursing") AND ("Professional Competence" OR "Competency-Based Education")                                                                                                                                                                                                                                               |
| Preprints for Health Sciences [medRxiv]   | ("Pediatric Oncology Nurse" OR "Pediatric Oncology Nursing") AND ("Professional Competence" OR "Competency-Based Education")                                                                                                                                                                                                                                               |
